1 **Microbiota-dependent elevation of Alcohol Dehydrogenase in *Drosophila* is**  
2 **associated with changes in alcohol-induced hyperactivity and alcohol preference**

3  
4 Malachi A. Blundon<sup>1</sup>, Annie Park<sup>2\*</sup>, Scott A. Keith<sup>1\*</sup>, Stacie L. Oliver<sup>1</sup>, Rory A. Eutsey<sup>1</sup>,  
5 Anna M. Pyzel<sup>1</sup>, Tiffany W. Lau<sup>1</sup>, Jennifer H. Huang<sup>1</sup>, Hannah M. Kolev<sup>1</sup>, N. Luisa  
6 Hiller<sup>1</sup>, Nigel S. Atkinson<sup>2</sup>, Jonathan S. Minden<sup>1</sup>, and Brooke M. McCartney<sup>1</sup>

7  
8 <sup>1</sup>Department of Biological Sciences, Carnegie Mellon University, Pittsburgh, PA 15213,  
9 USA

10 <sup>2</sup>Department of Neuroscience and Waggoner Center for Alcohol and Addiction  
11 Research, University of Texas at Austin, Austin, TX 78712, USA

12  
13 \*equal contribution

14  
15 **Corresponding Author:**

16 Brooke M. McCartney  
17 Department of Biological Sciences  
18 Carnegie Mellon University  
19 4400 Fifth Avenue  
20 Pittsburgh, PA 15213  
21 Phone: 412-268-5195  
22 Fax: 412-268-7129  
23 Email: [bmccartney@cmu.edu](mailto:bmccartney@cmu.edu)

24  
25 Keywords: microbiota, 2D-DIGE, alcohol dehydrogenase, alcohol, *Drosophila*, alcohol induced  
26 hyperactivity, alcohol preference

27

## 28 **Summary**

29           The gut microbiota impacts diverse aspects of host biology including metabolism,  
30 immunity, and behavior, but the scope of those effects and their underlying molecular  
31 mechanisms are poorly understood. To address these gaps, we used Two-dimensional  
32 Difference Gel Electrophoresis (2D-DIGE) to identify proteomic differences in male and female  
33 *Drosophila* heads raised with a conventional microbiota and those raised in a sterile  
34 environment (axenic). We discovered 22 microbiota-dependent protein differences, and  
35 identified a specific elevation in Alcohol Dehydrogenase (ADH) in axenic male flies. Because  
36 ADH is a key enzyme in alcohol metabolism, we asked whether physiological and behavioral  
37 responses to alcohol were altered in axenic males. Here we show that alcohol induced  
38 hyperactivity, the first response to alcohol exposure, is significantly increased in axenic males,  
39 requires ADH activity, and is modified by genetic background. While ADH activity is required, we  
40 did not detect significant microbe-dependent differences in systemic ADH activity or ethanol  
41 level. Like other animals, *Drosophila* exhibit a preference for ethanol consumption, and here we  
42 show significant microbiota-dependent differences in ethanol preference specifically in males.  
43 This work demonstrates that male *Drosophila*'s association with their microbiota affects their  
44 physiological and behavioral responses to ethanol.

45

## 46 **Introduction**

47           The human microbiota, the community of microorganisms including bacteria and fungi  
48 that resides in and on our bodies, contribute to metabolism, immunity, and defense against  
49 pathogens [1], [2]. Surprisingly, recent evidence suggests that the bacterial microbiota of the gut  
50 can also influence learning, memory, anxiety, depression, and autism-associated behaviors in  
51 some animals [3]–[6]. The number of connections being made between symbiotic bacteria and  
52 host physiologies and behaviors is rapidly increasing, making it likely that more associations  
53 await discovery. Furthermore, we understand relatively little about the molecular mechanisms  
54 that mediate any of these host-microbe interactions.

55           *Drosophila* is emerging as an excellent model to dissect the role of the microbiota in  
56 animal physiology and behavior. Bacteria in the order *Lactobacillales* are found in both the  
57 *Drosophila* and human microbiota [7]–[9], and links between the microbiota and host physiology  
58 and behavior are also present in *Drosophila*. Fly behaviors such as egg laying, feeding, male  
59 competition, and kin recognition all respond to changes in the microbiota [10]–[18]. The fly  
60 microbiota can modulate insulin, insulin-like growth factor, and Target Of Rapamycin (TOR)

61 signaling thereby affecting systemic homeostasis in the fly [19], [20]. Furthermore, host-  
62 pathogen studies in *Drosophila* have proven invaluable to unraveling the mechanisms of human  
63 innate immunity [21], [22]. Thus, *Drosophila* provides an excellent model for host-microbe  
64 interactions.

65 Proteome analysis provides valuable information about protein abundance and post-  
66 translational modifications (PTMs) that can be missed at the transcriptome level [14]–[17].  
67 Importantly, it has been shown that there is little correlation between mRNA expression and  
68 protein abundance [23]–[27]. While several studies have focused on microbe-dependent  
69 transcriptome changes in the *Drosophila* gut or in the whole fly [28]–[34], no proteomic analysis  
70 has been done. Two-Dimensional Difference Gel Electrophoresis (2D-DIGE) is a powerful  
71 technique to reveal proteomic changes between two or three protein samples simultaneously  
72 run on the same gel [35]–[38]. Protein differences detected by 2D-DIGE are then identified  
73 using liquid chromatography coupled to tandem mass spectrometry (LC-MS/MS).

74 Here we used 2D-DIGE to identify *Drosophila* proteins that are responsive to the  
75 microbiota. We focused on the *Drosophila* head proteome to search for proteins with potential  
76 roles in neural function and behavior, as this aspect of host-microbe interactions is not well  
77 understood. By comparing the head proteomes of male or female flies raised with a  
78 conventional microbiota (CV) to those raised in a sterile environment (axenic, AX), we identified  
79 22 proteins with altered abundance. Interestingly, several of these differences were sex specific.  
80 One of the male-specific difference-proteins is Alcohol Dehydrogenase (ADH), a key enzyme in  
81 ethanol metabolism in all animals, which was increased in AX males and reversed by  
82 reintroducing the conventional microbiota. ADH elevation suggested that AX males may have  
83 altered physiological and behavioral responses to alcohol. Indeed, we found that AX males  
84 exhibited significantly enhanced alcohol-induced hyperactivity (AIH), a response that is ADH  
85 dependent, male specific, and sensitive to host genetic background and dietary conditions.  
86 Using different measures of ethanol preference, we found that when offered a choice, AX males  
87 preferred to consume food containing alcohol significantly more than their CV siblings. Taken  
88 together, our work demonstrates a novel connection between the microbiota and host  
89 physiological and behavioral responses to alcohol in *Drosophila* that may have implications for  
90 our understanding of the microbiota's role in alcohol use disorders (AUD).

91  
92  
93  
94

## 95 **Results**

### 96 **The *Drosophila* head proteome is responsive to microbial condition**

97 To identify proteome changes in the heads of *Drosophila* with or without gut microbiota,  
98 we compared head lysates (Fig. 1A) of CV and AX siblings (SFig. 1) from a wild type strain  
99 called “Top Banana” (see methods). Lysates from CV and AX fly heads were independently  
100 labeled with either Cy3 or Cy5 2D-DIGE dyes. The labeled protein lysates were then combined  
101 and run on the same 2D-DIGE gel (Fig. 1A). We detected and quantified the protein spots using  
102 an open-source astronomy software package called SourceExtractor, as previously described  
103 [35], [36], [39]. Because we saw variability in host protein expression similar to what has been  
104 observed in host microbiota-dependent mRNA expression studies [40], [41], we used two  
105 criteria to determine whether a protein was different in CV vs AX heads. First, we used a 20%  
106 difference in protein abundance (1.2-fold) as a cut off for a significant protein expression  
107 difference; this is approximately three standard deviations above the technical noise in a  
108 standard 2D-DIGE experiment [36]. Second, significant proteins must be different in at least two  
109 of the three biological replicates. Using these criteria, we identified 22 and 16 reproducible  
110 difference-proteins in male and females, respectively (Fig. 1B,C, SFig. 2A&B). All of these  
111 difference-proteins exhibited protein abundance changes. While some of the differences were  
112 shared between males and females, most appeared to be sex-specific: four were male-specific  
113 (Fig. 1B&C, blue shaded region) and six were female specific (Fig. 1B&C, grey shaded region).  
114 Among the shared proteins, three changed abundance in the same direction in AX male and  
115 female flies (Fig. 1B&C, orange shaded region) and 3 changed abundance in the opposite  
116 direction (Fig. 1B&C, red shaded region). Additionally, six protein differences detected in the  
117 male head gels did not resolve in the female head gels (Fig. 1B, “did not compare” group).  
118 Together, our 2D-DIGE analyses revealed microbiota-dependent sexually dimorphic changes in  
119 the *Drosophila* head proteome.

120

### 121 **Alcohol Dehydrogenase protein level is elevated in the heads of AX male flies**

122 LC-MS/MS identified spot #4 (SFig. 2A&B) as the metabolic enzyme Alcohol  
123 Dehydrogenase (ADH). We confirmed the protein identity by immunoblotting for *Drosophila*  
124 ADH after 2DE separation of CV head lysate (Fig. 2A). 2D-DIGE analysis showed that the loss  
125 of microbiota leads to elevated ADH protein in the heads of AX males, but not AX females (Fig.  
126 1B and 2B). On average, ADH protein was elevated 1.8-fold in AX males. To confirm that the  
127 microbiota influences ADH protein levels, microbes were reintroduced to 0-1 day old AX adult  
128 males by exposure to CV fecal deposits (referred to as Reconstituted flies, RC; Fig. 1A). ADH

129 protein levels were restored to CV levels in RC males (Fig. 2B). One potential mechanism for  
130 the elevation of ADH protein is an increase in gene expression, but we did not find a consistent  
131 elevation of *Adh* transcripts in either AX male or female heads (Fig. 2C). Previous work had  
132 shown that ADH is not significantly expressed in fly brain [42], and consistent with this we find  
133 detectable ADH protein in the head capsule only (the head tissue without the brain; Fig. 2D).  
134 Because high levels of ADH are expressed in the abdominal fat body [42], the most likely site of  
135 ADH expression in the head is in the fat body that lies immediately anterior to the brain.  
136 Together, these data suggest a model in which the microbiota affect the level of ADH protein in  
137 the male head, likely in the fat body, through a mechanism that regulates ADH protein stability  
138 or translation efficiency.

139 The increase in ADH protein could result in increased ADH activity and increased  
140 ethanol metabolism. To test this, we quantified ADH enzymatic activity and ethanol levels in CV,  
141 AX, and RC males after exposing them to ethanol vapor. Because of assay limitations, it was  
142 not technically feasible to do these measurements with only heads. We thus characterized  
143 whole fly ADH activity and ethanol metabolism. These assays did not indicate any significant  
144 microbiota-dependent differences (SFig. 3A,B). While this does not rule out the possibility of  
145 tissue or cell type specific increases in ADH activity and ethanol metabolism, it does indicate  
146 that there is no significant systemic change.

147

#### 148 **AX male flies are more responsive to alcohol**

149 ADH catalyzes the oxidation of ethanol to acetaldehyde, which is the first step of ethanol  
150 metabolism. Thus, ADH influences several physiological responses to ethanol, including  
151 locomotor-hyperactivity [43]–[45]. Given the elevated ADH protein in AX male fly heads, we  
152 predicted that they may exhibit altered physiological responses to alcohol. To test this, we  
153 assessed alcohol induced hyperactivity (AIH) and sedation, two phases of alcohol induced  
154 responses common to all animals and well described in *Drosophila* [46], [47].

155 To assess AIH, we monitored locomotor activity of CV, AX, and RC males using the  
156 *Drosophila* activity monitor 2 (DAM2). This automated system uses infrared beams to quantify  
157 fly motility in the absence or presence of ethanol (Fig. 3A). Because ADH activity is required for  
158 AIH (SFig. 4A; [45]), we reasoned that AX males could have increased AIH due to elevated  
159 ADH protein. After monitoring baseline locomotion for 60 minutes, we exposed the flies to a low  
160 concentration of ethanol vapor (10:1 air to ethanol vapor) and continued monitoring for 120  
161 minutes. Shortly after being exposed to ethanol vapor, CV males entered a period of  
162 hyperactivity peaking at an average of 3.4 beam passes/10 min (Fig. 3B). AX males entered the

163 hyperactivity phase during the same time frame with a peak of 9.5 laser passes/10 min. This  
164 was restored to CV levels with microbial reconstitution in RC males (peak of 3.4 laser passes/10  
165 min; Fig. 3B). Consistent with the lack of ADH elevation in AX female heads, there was no  
166 difference in AIH between CV and AX females (SFig. 4B).

167 To understand the connection between increased ADH protein and AIH elevation, we  
168 asked whether AX males require ADH activity for their elevated AIH by treating CV and AX  
169 males with an ADH inhibitor, 4-Methylpyrazole [48]. If the elevated AIH in AX males requires  
170 ADH enzymatic activity, inhibiting ADH should reduce hyperactivity to the lower levels observed  
171 in CV. Indeed, AX males aged in the presence of the inhibitor for five days exhibited reduced  
172 AIH compared to control untreated AX males (Fig. 3C). Interestingly, the same inhibitor  
173 treatment of CV males did not significantly decrease their AIH, suggesting that the inhibitor  
174 treatment did not completely abolish ADH activity, or that there is a component of AIH that is  
175 ADH-independent (Fig. 3C).

176 Because diet and host genetic background are important for alcohol induced  
177 physiological changes, and influence the microbiota and its downstream effects [43], [49]–[53],  
178 we asked whether these factors influence microbiota-dependent AIH. First, we decreased  
179 protein availability to the adults by removing the autoclaved yeast supplement and found that  
180 this completely abolished the elevated AIH in AX males (Fig. 3D). To test if genetic background  
181 influences microbiota-dependent AIH, we examined AIH in two additional wild type lab strains,  
182 Canton S and Oregon R. Interestingly, there was no difference in AIH between Canton S CV  
183 and AX males (SFig. 4C). We did observe a significant increase in AIH in Oregon R AX  
184 compared to CV males (SFig. 4D), but the magnitude was less than what we found in Top  
185 Banana males (Fig. 3B). These data support the idea that diet and host genetic background  
186 interact with the microbiota to influence AIH in male flies.

187 Next, we asked whether the microbiota influences alcohol induced sedation, a  
188 physiological response that is largely independent of ADH activity [54]–[56]. To test this, we  
189 exposed groups of CV, AX, and RC males to ethanol vapor in fly vials and assessed the time to  
190 immobilization for the population [57]. The rate of sedation, assessed by comparing the time at  
191 which 50% of the population was immobilized (ST50), differed significantly between CV and AX  
192 males (Fig. 3E,F). AX males had a significantly higher ST50 (ST50=15.9 min) compared to CV  
193 males (ST50=11.7 min), and this was restored to CV levels in RC males (ST50=13.2 min).  
194 Overall, these data demonstrate that males have microbiota-dependent changes to AIH and  
195 sedation, and that the elevation in AIH requires ADH activity.

196

## 197 **AX males flies exhibit altered alcohol preference**

198 Human studies have shown that differences in physiological responses to alcohol can  
199 influence alcohol consumption behavior and are a predictor of future alcohol addiction [58]. To  
200 determine whether the microbiota affects alcohol consumption and preference, we asked  
201 whether AX males have an altered alcohol preference. We first assessed alcohol feeding  
202 preference using the well-established Two-choice Capillary Feeder (CAFÉ; SFig. 5A) assay  
203 [59], and observed that both AX and RC males exhibited significantly altered alcohol food  
204 preference compared to CV males (SFig. 5B-D). However, approximately 15% of the flies in  
205 each condition died by the end of day 5 (data not shown), and some have suggested that flies  
206 are experiencing starvation conditions in the assay [60]–[62]. This is particularly problematic for  
207 assessing alcohol preference because it is difficult to separate a preference for alcohol due to  
208 its pharmacological effects from a preference driven by its increased caloric content. To address  
209 this potential caveat to the CAFÉ results, we used BARCODE, a new starvation-independent  
210 alcohol preference paradigm that uses a sectioned stage providing unlimited food access, and  
211 promoting a more natural feeding behavior of roaming and sampling [63]. The sectioned stage  
212 contains alternating squares of solid fly food with and without ethanol in a large chamber (Fig.  
213 4A). BARCODE permits measurement of both positional preference and food consumption  
214 preference. Positional preference is determined by counting the average number of flies on  
215 ethanol food squares versus non-ethanol food squares normalized to the total number of flies on  
216 the stage. CV and RC males had an aversion to the ethanol squares (average PI = -0.10),  
217 which decreased toward neutral by day 2 (Fig. 4B). In contrast, AX males exhibited a positional  
218 preference for ethanol that did not change significantly during the assay (average PI = +0.10;  
219 Fig. 4B,C) compared to both CV and RC males.

220 To quantify alcohol food consumption preference, the ethanol squares and the non-  
221 ethanol squares were spiked with two different oligonucleotides. Following the two days of the  
222 assay, qPCR was used to quantify these sequences in lysates of surface-washed flies, and  
223 these values were used to calculate the alcohol consumption PI. Although CV and RC males  
224 spent less time on the ethanol squares (Fig. 4C), they consumed more ethanol food than non-  
225 ethanol food (PI = 0.12 and 0.07 respectively; Fig. 4D). Consistent with the increase in  
226 positional preference, AX males consumed significantly more ethanol food than CV or RC males  
227 (PI = 0.40; Fig. 4D). Together, the BARCODE assays indicate that AX males have a  
228 significantly stronger preference for food containing ethanol than their CV or RC siblings.

229

230

## 231 Discussion

232 The microbiota's ability to profoundly influence host physiology and behavior has  
233 important implications for understanding normal biology and disease states, and we are only  
234 beginning to discover the scope of that influence and the underlying molecular mechanisms.  
235 Using a gel-based proteomic screen, we identified both generic and sex-specific microbiota-  
236 dependent proteome changes in the *Drosophila* head. In humans, mice, and flies, the  
237 composition of the microbiota appears to be different in males and females [64]–[66], and in  
238 mice this difference is mediated by sex hormones, and sex-specific differences in bile acids and  
239 immunity [67]–[69]. The interactions between host sex and gut microbiota appear to contribute  
240 to sex-specific differences in Type 1 diabetes [67], and liver carcinogenesis [68]. While these  
241 connections are being made, there is much to learn about the mechanisms that control sex-  
242 specific differences in the microbiota and sex-specific responses to the microbiota. To date only  
243 one transcriptomic study has examined microbe-dependent gene expression changes in both  
244 male and female adult *Drosophila* tissues [32]; all other studies have focused exclusively on  
245 females [40], [70]. Thus, sex-specific microbe-dependent changes to host gene expression and  
246 protein levels have not been thoroughly investigated. We anticipate that comprehensive  
247 identification and analysis of the sex-specific difference proteins we identified in this study could  
248 yield important insight into the underlying molecular mechanisms connecting sex, the  
249 microbiota, and host biology.

250 One male-specific difference-protein we identified is ADH, elevated 1.8-fold in AX male  
251 heads (Fig. 2B). Because *Adh* mRNA was not responsive to microbiota elimination (Fig. 2B), we  
252 propose that ADH elevation results from increased translation or protein stability. Although ADH  
253 stability is affected by PTMs [71]–[73], we did not detect PTM changes in ADH by 2D-DIGE.  
254 Because the *Drosophila* abdominal fat body is a major site of alcohol metabolism [74], and ADH  
255 was not detectable in the brain (Fig. 2D), we propose that ADH elevation is most likely occurring  
256 in the fat body surrounding the brain. The fat body, together with the abdominal oenocytes, is  
257 functionally analogous to the liver [75], and reciprocally communicates with the brain to regulate  
258 physiology, including neural and immune activity [76]–[78]. AIH increase in AX males requires  
259 ADH activity (Fig. 3C), and ADH-dependent ethanol metabolism is required for AIH ([36] and  
260 SFig. 3A), but the precise mechanism by which ethanol metabolism mediates the elevated  
261 locomotor activity characteristic of AIH is not known. Interestingly, the lack of detectable  
262 systemic differences in ADH activity and ethanol metabolism between CV and AX flies (SFig.  
263 3A,B) suggests that ADH elevation and activity increase in AX males is head specific. While  
264 little is known about the functional differences between head fat body and abdominal fat body,



265 several head fat body specific GAL4 drivers exist [79], arguing for some functional distinction.  
266 Elevated ADH activity in the head fat body could protect the brain from direct effects of ethanol,  
267 such as interference with neurotransmitters [80]–[84]. Alternatively, elevated ADH could  
268 indirectly affect the brain by changing fat body metabolism and consequently altering  
269 downstream neuropeptide or immunity signaling to the brain [85]–[87].

270 In addition, the increase in ADH that we observe in AX males could be a mechanism to  
271 compensate for the absence of microbial-derived byproducts, like short-chain fatty acids  
272 (scFAs), that normally promote host metabolic functions [88], and affect other aspects of host  
273 development, physiology, and behavior [89]–[94]. AX flies can have abnormally high  
274 triglycerides indicative of a change in lipid metabolism [95], [96]. In flies, ADH-dependent  
275 ethanol metabolism promotes lipid synthesis directly by converting ethanol to the scFA acetate  
276 [97]. Because *Drosophila* in the wild feed on fermenting fruit (which contains up to 5% EtOH),  
277 ethanol may contribute to normal lipid metabolism [98]. Acetic Acid is also produced by the  
278 *Drosophila* microbiota and impacts development and reproductive behaviors [99], [100].  
279 Because sex, genetic background, and nutrition affect microbiota-dependent metabolic changes  
280 [95], [96], [101], ADH levels, and physiological and behavioral responses to alcohol (this work),  
281 a comprehensive understanding of the connections between the microbiota, host metabolism,  
282 and ADH necessitates that all of these variables be taken into account. An alternative  
283 hypothesis is that the microbiota may control host ADH and physiological and behavioral  
284 responses to alcohol to improve fitness through foraging. Recent work has demonstrated that  
285 the microbiota can promote optimal foraging and enhance fitness through multiple mechanisms  
286 [13], [16], [18]. Interestingly, *Drosophila's* responsiveness to microbe-derived alcohol and by-  
287 products of its microbe-dependent catabolism influences egg-laying behavior and promotes  
288 fitness [10].

289 While a microbe-dependent mechanism affecting *Drosophila's* response to alcohol may  
290 be adaptive, varying alcohol responsiveness in humans can have harmful effects. Multiple  
291 factors contribute to the risk of alcohol use disorder (AUD) in people including  
292 disinhibition/impulsivity, patterns of alcohol metabolism, a low level of response to alcohol, and  
293 increased alcohol preference [102]. Among these, a low level of responsiveness to alcohol is the  
294 most well studied, is a strong predictor of future alcoholism, and its heritability is as high as 60%  
295 [103]. We demonstrated that AX males have an increased preference for alcohol consumption  
296 (Fig. 4), as well as increased responsiveness to alcohol as reflected in elevated AIH (Fig. 3).  
297 The sex-specific effect on responsiveness in *Drosophila* is an interesting parallel to what has  
298 been found in human studies; while decreased alcohol responsiveness is strongly associated

299 with an increased risk of alcohol abuse in men, the same does not appear to be true in women  
300 [103]. In addition, emerging evidence suggests that alcohol consumption can cause dysbiosis of  
301 the gut microbiota observed in a subset of alcoholic patients [104], [105]. This dysbiosis appears  
302 to contribute to the neuro-inflammatory withdrawal response [106], and to the emotional effects  
303 of alcohol abuse [107]. Taken together, this accumulating evidence suggests that the microbiota  
304 may be an important contributing factor to how animals respond to alcohol. Dissecting this  
305 connection may impact our understanding of the risk factors for AUD as well.

306

### 307 **Author contribution**

308 Conceptualization, B.M.M.; Methodology, M.A.B., B.M.M., J.S.M., N.S.A., and N.L.H.;  
309 Investigation, M.A.B., S.A.K., A.P., S.O., R.A.E., A.M.P., T.W.L., J.H.H., and H.M.K.; Writing –  
310 Original Draft, M.A.B.; Writing – Review & Editing, M.A.B., B.M.M., N.L.H., J.S.M., and N.S.A.;  
311 Funding Acquisition, B.M.M., J.S.M., N.L.H.; Resources, B.M.M., J.S.M., N.S.A., and N.L.H.;  
312 Supervision, B.M.M. and J.S.M.

313

### 314 **Acknowledgements**

315 We thank the McCartney, Minden, and Atkinson lab members for useful comments and edits  
316 during the preparation of the manuscript. We would also like to thank the Woolford, Etensohn,  
317 Lopez, Hinman, and Linstedt labs for reagents and equipment use, and Odelia Cheng and  
318 Rebecca Lee for help characterizing the CV and RC male flies. This work was supported by a  
319 Charles E. Kaufman Foundation New Initiative Grant awarded to B.M.M., N.L.M., and J.S.M.,  
320 and the UPCI Cancer Biomarkers Facility that is supported in part by award P30CA047904. A.P.  
321 was supported by NIH T32 AA07471.

322

323

# FIGURE 1

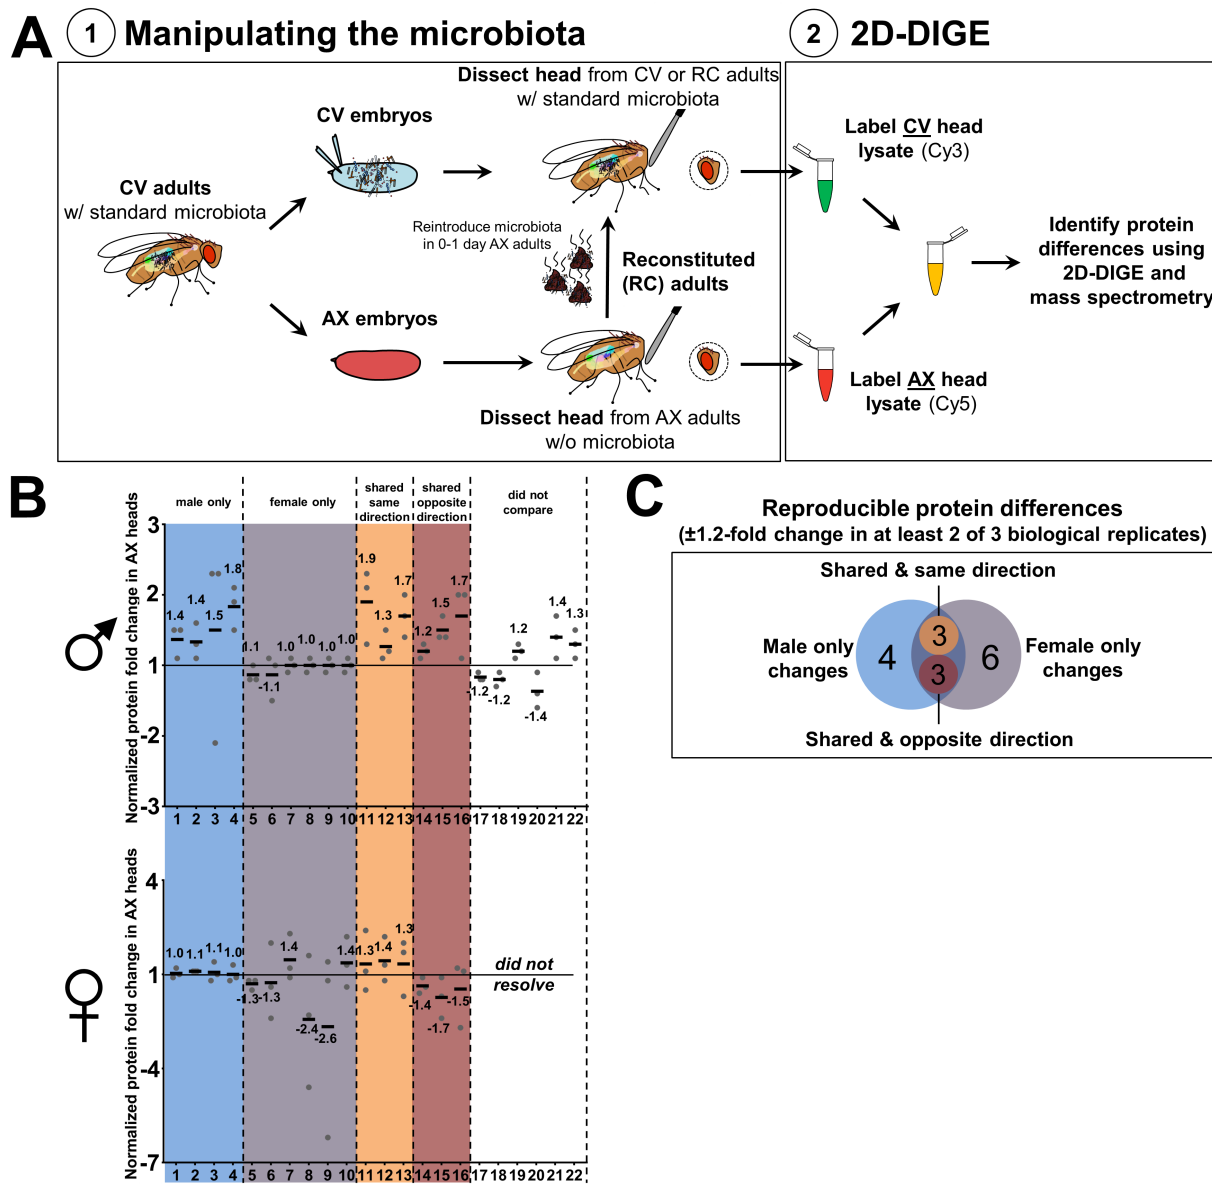

324  
325 **Figure 1. Identification of microbe-dependent differences in *Drosophila* male and female**  
326 **head proteomes.**

327 **(A)** Manipulating the microbiota and 2D-DIGE screen experimental design. (1) CV, AX, and RC  
328 siblings were derived from cohorts of embryos with the same parents. CV embryos were not  
329 manipulated, while AX embryos were dechorinated and reared under sterile conditions (see  
330 methods). 0-1 day old CV and AX adult flies were transferred to vials and aged for 5-6 days. For  
331 microbial reconstitution (RC), 0-1 day old AX flies were transferred to vials conditioned with  
332 feces from CV males and aged for 5-6 days. (2) Protein lysates were prepared from dry  
333 dissected heads, covalently labeled with either propyl-Cy3 or methyl-Cy5, combined, and co-

334 electrophoresed on a 2DE gel. Difference proteins were identified by LC-MS/MS. **(B)** Measured  
335 fold-change for each protein difference was calculated using the Cy3 and Cy5 raw fluorescence  
336 intensities. Each dot represents a biological replicate containing 40 fly heads. Solid black bars  
337 indicate the mean. Six difference proteins identified in males (17-22) could not be resolved in  
338 the gels with female samples. **(C)** The Venn diagram shows a summary of the 16 reproducible  
339 protein differences for male and female data sets across three biological replicates. The color  
340 code matches that of panel B.  
341

## FIGURE 2

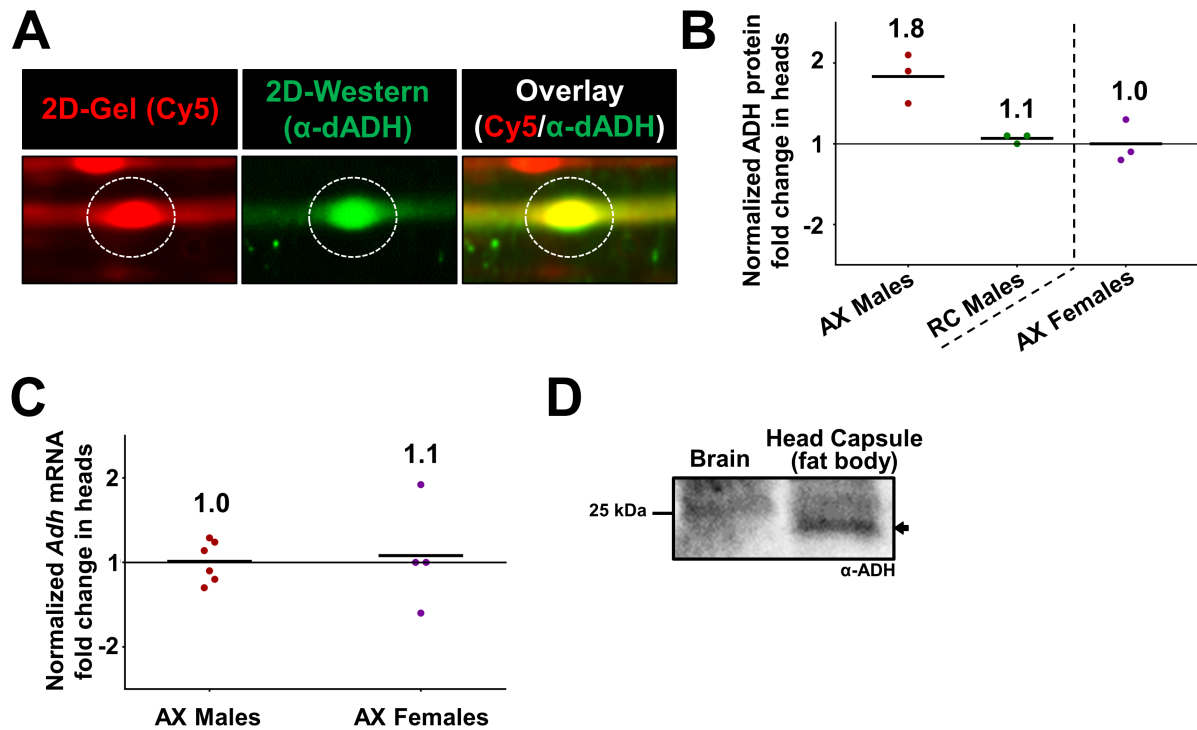

342

343 **Figure 2. Alcohol Dehydrogenase (ADH) protein, but not mRNA, is elevated in AX male**  
344 **heads and decreased with microbial reconstitution.**

345 **(A)** 2D-Western blot of the ADH protein in the CV male head proteome. The overlay of the Cy5  
346 labeled protein (red) with the signal from the anti-ADH immunoblot (green) confirmed the protein  
347 identification made by LC-MS/MS. **(B)** Reconstitution (RC) of the microbiota in AX adult males  
348 restored ADH to CV levels. AX male and female data shown were re-plotted from Fig. 1B. **(C)**  
349 RT-qPCR revealed no change in *Adh* transcription in AX compared to CV heads when  
350 normalized to *rpl32*. **(D)** Anti-ADH immunoblot of isolated CV male brains and head capsules  
351 (containing fat body) shows detectable ADH only in the head capsule (arrow).

352

## FIGURE 3

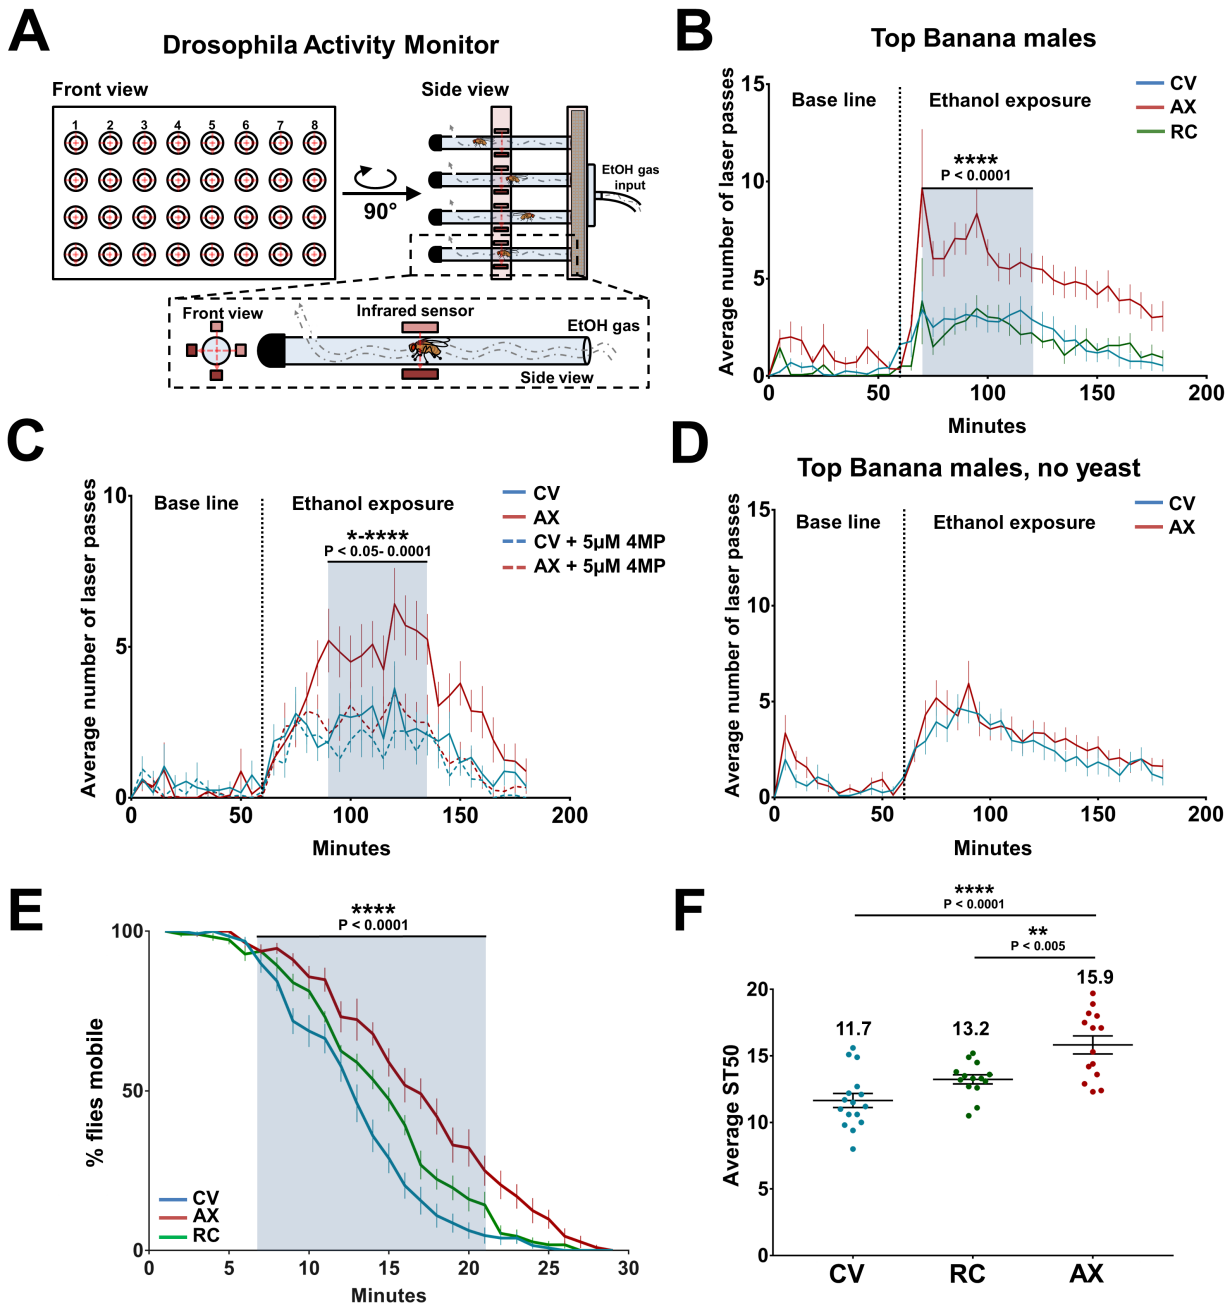

353  
354 **Figure 3. Microbe-dependent differences in hyperactivity and sedation responses to**  
355 **alcohol vapor exposure.**

356 **(A)** A schematic of the *Drosophila* Activity Monitor used to test alcohol induced hyperactivity  
357 (AIH). **(B-D)** In all experiments examining AIH, the flow ratio was H<sub>2</sub>O:EtOH (10:1) and the  
358 dotted lines indicate start of ethanol exposure. The error bars indicate standard error of the  
359 mean and statistical significance (blue shaded region) was assigned by a two-way ANOVA

360 using **(B)** Tukey's multiple comparisons post hoc test or **(C)** Dunnett's multiple comparisons  
361 post hoc test. **(B)** AX males exhibited significantly elevated AIH compared to their CV and RC  
362 siblings. n = 32 flies in 4 trials/condition. **(C)** AIH in CV and AX males with and without 5  $\mu$ M 4-  
363 Methylpyrazole demonstrated that ADH activity is necessary for the elevated AIH in AX males. n  
364 = 24 flies in 3 trials/condition. **(D)** AIH in CV and AX males raised in the absence of autoclaved  
365 inactive yeast granules shows that nutrient deprivation suppresses the elevated AIH in AX  
366 males. n = 32 flies in 4 trials/condition. **(E-F)** AX males exhibit delayed alcohol induced sedation  
367 compared to their CV and RC siblings. **(E)** Alcohol induced sedation curves for CV (n=128 in 16  
368 vials), AX (n=112 in 14 vials), and RC (n=112 flies in 14 vials) males averaged from 4 trials.  
369 Bars indicate standard error of the mean. Statistical significance (blue shaded region, CV vs. AX  
370 comparison) was assigned by a two-way ANOVA (Dunnett's multiple comparisons post hoc  
371 test). **(F)** Average ST50 derived from the alcohol induced sedation curves in panel E. Each dot  
372 represents the ST50 for a single vial. Bars indicate standard error of the mean and statistical  
373 significance was assigned by a one-way ANOVA (Tukey's multiple comparisons post hoc test).  
374

## FIGURE 4

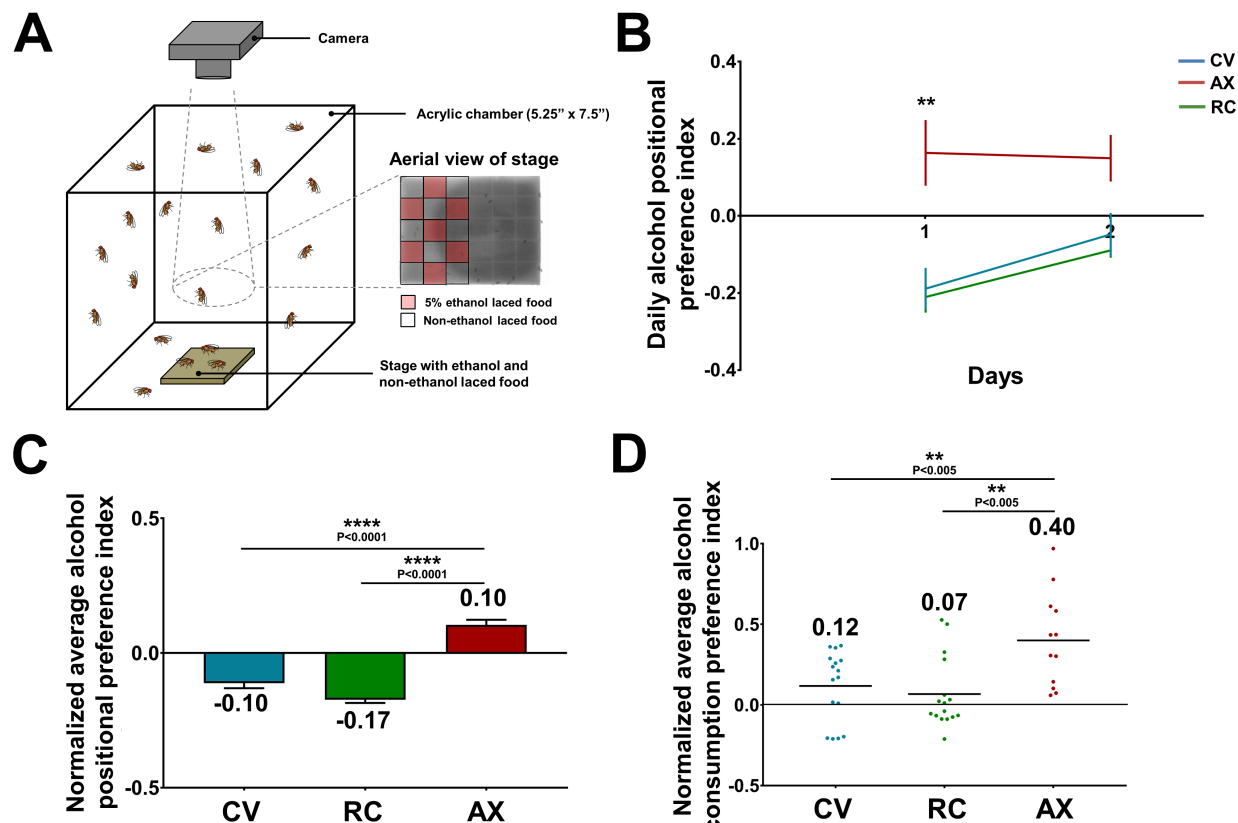

375  
376 **Figure 4. AX males exhibit a greater preference for alcohol compared to their CV or RC**  
377 **siblings.**

378 **(A)** A schematic of the BARCODE assay to test alcohol preference. **(B)** Daily alcohol positional  
379 preference for CV, AX, and RC males. On day one, AX male flies were significantly different  
380 from CV and RC flies (\*\*, P=0.0092 and P=0.0032, respectively). No significant difference was  
381 observed on day two. n = 50 flies/condition. Bars indicate standard error of the mean and  
382 statistical significance was assigned by a two-way ANOVA (Tukey's multiple comparisons post  
383 hoc test). **(C)** Normalized average alcohol positional preference index for CV, AX, and RC  
384 males over the two days of the assay. n = 50 flies/condition. Bars indicate standard error of the  
385 mean and statistical significance was assigned by a Kruskal-Wallis test (Dunn's multiple  
386 comparisons post hoc test). **(D)** Normalized average alcohol consumption preference index for  
387 CV, AX, and RC males over the two days of the assay reveals that AX males have a  
388 significantly greater preference for alcohol consumption than their CV or RC siblings. Each dot  
389 represents the average of five flies. Solid black bars indicate the mean and statistical  
390 significance was assigned by a one-way ANOVA (Holm-Sidak's multiple comparisons post hoc  
391 test).



392

## 393 **Materials and methods**

### 394 ***Drosophila* stocks**

395 Top Banana is a recent wild isolate (Seattle, WA) generously donated by M. Dickinson  
396 (CalTech). We used the following stocks from the Bloomington *Drosophila* Stock Center:  
397 Oregon R (Stock #5), Canton S (Stock #64349), and *Adh<sup>N1</sup>* (Stock #3976). Canton S was  
398 obtained from the Bloomington *Drosophila* Stock Center before the *w-* and *y-* transgene  
399 contamination. *Wolbachia* PCR analysis was performed on the three wild-type stocks showing  
400 that Top Banana and Canton S were infected with *Wolbachia*, and Oregon R was *Wolbachia*  
401 free (not shown).

402

### 403 **Creation of CV, AX, and RC cultures**

404 CV and AX cultures were derived from embryos obtained from the same parents. A 4  
405 hour collection of embryos was transferred in standard embryo wash (120 mM NaCl and 0.04%  
406 Triton X-100) to a plastic petri dish. For CV cultures, approximately 150 embryos were  
407 transferred to a fresh culture bottle containing autoclaved molasses fly food (8.5% molasses,  
408 7% cornmeal, 1.1% brewer's yeast, 0.86% agar, supplemented with 0.27% propionic acid,  
409 0.23% methyl-parahydroxybenzoate, and 0.23% ethanol). Autoclaved inactive yeast was added  
410 to the bottle cultures (0.2-0.3g per bottle). Embryos for AX cultures were prepared as previously  
411 described [101], [102] with a few adaptations. Embryos were transferred to a separate  
412 microcentrifuge tube and treated with filtered sterilized 50% bleach for two minutes, then rinsed  
413 in sterilized 70% ethanol twice, and once with sterile water to dechorionate the embryos and  
414 eliminate microbes that were associated with the chorion. Approximately 250 AX embryos were  
415 transferred to an autoclaved culture bottle containing autoclaved yeast granules as above. The  
416 difference in embryo seeding density for the two culture conditions was necessary to ensure  
417 consistent larval density and comparable nutritional environments. All adult flies were collected  
418 0-1 day post-eclosion into autoclaved food vials containing ~0.05g autoclaved inactive yeast  
419 granules. The flies remained in these collection vials for 5 days before being used for  
420 experiments. For RC flies, 0-1 day old AX adults were placed in preconditioned food vials that  
421 had housed ten CV males (~one week old) for 4 days. RC males were aged in preconditioned  
422 vials for 5 days. All fly cultures were reared and adult progeny maintained at 22-23°C/70%  
423 relative humidity/12-12hr light-dark cycle.

424

### 425 Verification of AX cultures

426 For culture-dependent verification, ten 5-6 day post-eclosion CV and AX flies were  
427 homogenized manually with a sterile pestle in 100  $\mu$ L 1X PBS and three serial ten-fold dilutions  
428 were prepared. Undiluted homogenates and homogenate dilutions were then plated on MRS  
429 agar (wt/vol: 1% peptone, 1% beef extract, 0.4% yeast extract, 2% glucose, 0.5% sodium  
430 acetate, 0.1% polysorbate 80, 0.2% dipotassium hydrogen phosphate, 0.2% triammonium  
431 citrate, 0.02% magnesium sulfate, 0.005% manganese sulfate, 1% agar), Ace agar (wt/vol or  
432 vol/vol: 0.8% yeast extract, 1.5% peptone, 1% dextrose, 1.5% agar, 0.3% acetic acid, 0.5%  
433 ethanol), and Nutrient agar (wt/vol: 0.5% peptone, 0.3% yeast extract, 0.5% sodium chloride,  
434 1.5% agar). Plates were incubated at 30°C for 48-72 hours. Plated CV fly homogenate  
435 consistently yielded robust microbial growth, while plated AX fly homogenate consistently  
436 yielded no growth (Figure S1B).

437 For culture-independent characterization, two 0-1 day old males were homogenized  
438 manually in filter sterilized squishing buffer (10 mM Tris pH 8.0, 1 mM EDTA pH 8.0, and 25 mM  
439 NaCl) with a fitted pestle until no obvious particulates could be seen. The homogenates were  
440 incubated with Proteinase K for 1 hour and boiled for 5 minutes. 150 ng of total DNA was used  
441 as template for PCR amplification. See Table 2 for primer information. Amplified DNAs were  
442 Sanger sequenced by Genewiz (South Plainfield, NJ).

443

#### 444 Quantifying microbial load in CV and RC flies

445 Ten 5-6 day post-eclosion CV or RC flies were surface sterilized by sequential washes in  
446 10% sodium hypochlorite and 70% ethanol. Flies were then washed three times with 1X PBS  
447 and mechanically homogenized in 125 $\mu$ L 1X PBS with ~125 $\mu$ L 1.0mm zirconia beads in a Mini-  
448 Beadbeater-16 (BioSpec Products) for 30 seconds. Five ten-fold serial dilutions were then  
449 prepared from fly homogenates and all dilutions were plated on both MRS and Ace agar plates.  
450 MRS plates were incubated at 37°C and Ace plates were incubated at 30°C for ~48 hours prior  
451 to counting colonies. *Lactobacillus brevis* and *Acetobacter* colonies were distinguished by  
452 characteristic colony morphologies. For each biological replicate, colonies were counted from all  
453 dilution plates with distinguishable colonies. CFU/fly values were calculated as follows: CFU/fly  
454 =  $((C \times D)/V) \times (H / F)$ , where C = colony counts, D = dilution factor, V = volume of diluted  
455 homogenate plated, H = volume in which flies were homogenized, and F = number of flies  
456 homogenized, as in Koyle et al. [101].

457

458 **Two-dimensional fluorescence difference gel electrophoresis (2D-DIGE), imaging**  
459 **analysis and protein quantification**

460 Forty 5-6 day old flies were dry dissected on a sterile CO<sub>2</sub> pad and the heads were  
461 pooled in lysis buffer (7 M urea, 2 M thiourea, 4% CHAPS, 10 mM DTT and 10 mM Na-Hepes  
462 pH 8.0) spiked with 1% protease inhibitor (Sigma-Aldrich, St. Louis MO, USA). The heads were  
463 homogenized manually with a fitted pestle until no obvious particulates could be seen. Head  
464 lysates were adjusted to 2 mg/ml protein concentration with lysis buffer using the Bradford  
465 standardizing method. Protein lysate solutions containing a total of 100 µg of protein were  
466 labeled with 2 µl of either 1mM propyl-Cy3-NHS or 0.83 mM methyl-Cy5-NHS (CyDye DIGE  
467 Fluors; GE Healthcare) as described previously [103], resulting in fewer than one dye molecule  
468 per protein to prevent changing protein migration in 2DE gels. Reciprocal labeling experiments  
469 were performed to control for dye-dependent changes and to generate technical replicates of  
470 each sample. Two-dimensional electrophoresis (2DE) was performed as previously described  
471 [104]. After second dimension electrophoresis, the gels were fixed in a solution of 40%  
472 methanol and 10% acetic acid overnight then imaged in a lab built imager [32]. Protein  
473 differences were determined by quantifying grey scale images of each channel using Source  
474 Extractor as previously described [32], [33]. To determine the fold-difference between CV and  
475 AX expression of a protein, the intensity values of each channel were normalized to five “guide  
476 star” proteins, protein spots that reliably do not change within the proteome (determined from  
477 multiple biological replicates), and analyzed as previously described [28], [32], [105].

478

479 **Immuno-blotting of ADH protein**

480 For standard western blots, CV brain and head capsule lysates were prepared in 2X  
481 Laemmli sample buffer treated with 0.1% Protease Inhibitor Cocktail (Sigma-Aldrich, St. Louis  
482 MO, USA) and separated by SDS-PAGE. For 2D-Westerns, CV head lysate was labeled with  
483 Cy5 dye and run on a 2DE gel, as described above. Gels were equilibrated in a Tris buffer at pH  
484 7.5 with 20% glycerol for 30 minutes. Proteins were transferred to Protran nitrocellulose  
485 membranes (Whatman, Little Chalfont Buckinghamshire, UK) overnight in carbonate transfer  
486 buffer at pH 9.9 (100mM NaHCO<sub>3</sub> and 80uM Na<sub>2</sub>HCO<sub>3</sub>) at constant 25 V. Membranes were  
487 immuno-blotted using a goat anti-*Drosophila* ADH antibody at 1:500 (Santa Cruz  
488 Biotechnologies, Dallas TX, USA). Donkey anti-goat HRP secondary antibody (Jackson  
489 Immunoresearch, West Grove PA, USA) was used at 1:2,000. Chemiluminescence (Pierce ECL  
490 Western Blotting Substrate, Thermo Scientific) was detected using a ChemiDoc MP Imaging  
491 System (Bio-rad).

492

### 493 **qRT-PCR analyses of *Adh* gene expression levels**

494 Five to six day old CV and AX fly heads were dry dissected under CO<sub>2</sub> sedation. Ten  
495 heads per sample were immediately bead beaten with approximately 50µl of 0.5 mm  
496 Zirconia/Silica beads in 500µl of Trizol (Invitrogen, Carlsbad CA, USA). The homogenates were  
497 immediately frozen at -20°C until RNA extraction (stored no longer than 2 weeks).

498 RNA was extracted from *Drosophila* heads with the Direct-zol RNA mini kit (Zymo, Irvine  
499 CA, USA). 500 ng of high quality RNA ( $A_{260/280} \sim 1.8-2.0$ ) was used as template for the synthesis  
500 of first strand of cDNA using the SuperScript VILO synthesis kit (Invitrogen, Carlsbad CA, USA).  
501 After first strand cDNA synthesis, 100 ng of the cDNA product was directly used for qRT-PCR  
502 using the PowerUp SYBR Green Master Mix in a 7300 Real Time PCR System (Applied  
503 Biosystems, Foster City CA, USA) using Sequence Detection Software (v1.4.0.25, Applied  
504 Biosystems, Foster City CA, USA).

505 Housekeeping gene *rpl32* (*ribosomal protein L32*) was used for normalization [106], and  
506 data were analyzed using the Pfaffl- $\Delta\Delta$ CT method [107] in Fig. 2C. We determined the primer  
507 efficiencies for all primer sets used to calculate the fold-change between CV and AX flies. Fold  
508 changes presented are the mean results from six biological replicates for males and four for  
509 females.

510

### 511 **Assessing alcohol induced hyperactivity**

512 Locomotor activity was analyzed with a *Drosophila* Activity Monitor 2 (DAM2; Trikinetics,  
513 Waltham, MA, USA) that can accommodate a total of 32 flies in individual tubes (Fig. 3A). For  
514 inhibitor conditions, CV and AX male flies were aged for five days in vials with sterile fly food  
515 and sterile yeast paste containing 5µM 4-methylpyrazole (Sigma-Aldrich, product code:  
516 286672). For all experiments using the DAM2, single 5-6 day old adults were placed under mild  
517 CO<sub>2</sub> sedation and transferred into monitoring plastic tubes (5 mm diameter) capped at one end  
518 with a rubber cap. Tubes were randomly loaded onto a Trikinetics exhaust manifold. Base line  
519 activity was established for the first hour followed by a 2 hour ethanol exposure (PHARMCO-  
520 AAPER, Shelby KT, USA) using a mixture of air to ethanol vapor at a 10:1 ratio (empirically  
521 determined for max hyperactivity difference) delivered by a homemade vaporizer. Activity data  
522 (crossings of an infrared beam) were collected by the Trikinetics computer software in bins  
523 every 30 seconds and later converted to 5 minute bins. A total of 8 flies from each condition  
524 were run in parallel in any given experiment. Data were pooled from different trials for each  
525 condition to obtain average activity levels. Locomotor activity curves were generated and

526 statistical analysis was performed with GraphPad Prism 7. A two-way ANOVA was used to  
527 compare the hyperactivity curves.

528

### 529 **Assessing alcohol induced sedation**

530 The alcohol sedation assay was performed as described in Maples and Rothenfluh  
531 (2011) with minor adaptations. 0-1 day adult males were collected in batches of 8 under CO<sub>2</sub>  
532 and aged to 5-6 days. Fresh fly food vials were converted into ethanol chambers by creating a  
533 flat cotton bed at the bottom of the vial and sealing the chamber with a cotton ball soaked in  
534 100% ethanol [50] (PHARMCO-AAPER, Shelby KT, USA). The chamber size was  
535 approximately 1.25" in height.

536 A typical alcohol sedation experiment contained 4-5 vials each of CV males and AX  
537 males. The flies were transferred to ethanol chambers, conditions randomized, and numbered.  
538 The vials were taped together in batches of 4-5 vials. An iPad was used to record videos of  
539 each trial. Before recording, each dry ethanol chamber cotton ball was replaced with a cotton  
540 ball soaked in roughly 1.2 mL of red dyed ethanol. Time zero started after all dry cotton balls  
541 were replaced. During the experiment, the vials were tapped every minute and immobility was  
542 assessed after a 15 second recovery period until full sedation was reached. After the 15 second  
543 recovery period, the number of flies immobilized was recorded and the mobile fraction was  
544 calculated. The ethanol cotton ball was readjusted after every tap series to ensure the chamber  
545 was approximately 1.25" high throughout the experiment. The videos were analyzed by two  
546 observers who were blinded to the microbial conditions of the flies. Flies were deemed immobile  
547 if: (1) the fly traveled less than the radius of the vial (to account for postural struggle or  
548 spontaneous jumps after immobilized), (2) the fly lost postural control and flipped orientation, or  
549 (3) the fly was completely motionless or stationary with tremors while maintaining postural  
550 control. Statistical significance was determined by performing a two-way ANOVA comparing the  
551 sedation curves and a one-way ANOVA for the ST50 values using GraphPad Prism 7.

552

### 553 **Assessing alcohol food preference using the Two-choice Capillary Feeder (CAFE) assay**

554 CV, AX, and RC male sibling flies were tested in the CAFE assay as previously  
555 described [54]. Each vial housed 8 flies and contained 4 capillaries. The capillaries contained a  
556 liquid food comprised of 5% yeast extract and 5% sucrose with either no ethanol (2) or 10%  
557 ethanol (2). Measurements of food levels in the capillaries were taken daily by four observers.  
558 Death counts for each vial were also noted per day. The assay was carried out for 5 days and

559 measurements were taken at the same time each day. Capillaries were replaced with fresh food  
560 solution each day.

561

### 562 **BARCODE alcohol preference assay**

563 Fifty 5-6 day old CV, AX, RC flies were tested in parallel in three separate BARCODE  
564 chambers. Standard molasses based fly food with agar was used for preference assays. Fly  
565 food was liquified and additives were mixed in once the food was cooled to ~35 °C. The food  
566 grid was filled in an alternating pattern with food containing 5% ethanol or non-ethanol food to  
567 which a matching volume of water was added. The food type specific oligomers were added to  
568 the corresponding food type at 3.5 ng/μl. After 2 days, the flies were collected from the chamber  
569 using CO<sub>2</sub> and frozen immediately for future DNA extraction (see below).

570

### 571 Positional alcohol preference analysis

572 Preference was tested behaviorally in the BARCODE assay by capturing images of the  
573 position of flies on the food pad in 5 minute intervals for 48 hrs. We used BTV Pro for Mac (Ben  
574 Software) for automatic capture and analyzed using a custom Perl script and ImageMagick  
575 (ImageMagick 7.0.5-0). The Preference Index (PI) was measured by counting the number of  
576 flies on ethanol and non-ethanol food squares per day and calculated as  $PI = (N \text{ Flies on Ethanol} - N \text{ Flies on Non-Ethanol}) / \text{Total } N \text{ Flies on Stage}$ .

578

### 579 Consumptive alcohol preference analysis

580 Consumptive preference was measured following the conclusion of the behavioral  
581 assay. Flies were washed using the washing protocol in [108] and homogenized in a squishing  
582 buffer (10 mM Tris-HCl @ pH 8.2, 1 mM EDTA, 25 mM NaCl). For each qPCR biological  
583 replicate, we homogenized five flies per sample (n=5). Homogenates were then incubated with  
584 Proteinase K (NEB, Ipswich, MA, Product No. P8107S) and spun down for 2 minutes at 10,000  
585 G. Ten microliters of the supernatant was used for qPCR with the ThermoFisher Power SYBR™  
586 Green PCR Master Mix reagents (Waltham, MA, Catalog No. 4367659) and analyzed with a  
587 ThermoFisher Viiia 7 Real-Time PCR System (Waltham, MA) with a  $T_m = 60$  °C and 40 cycles  
588 per run.

589

### 590 **Measuring alcohol levels**

591 20 males per biological replicate were pretreated with 10% ethanol vapor for 30 minutes  
592 with a homemade vaporizer then frozen immediately. Flies were homogenized with glass

593 dounce homogenizers using 20  $\mu$ L ddH<sub>2</sub>O per fly. The homogenate was pipetted into 1.5 mL  
594 tubes and centrifuged at 10,000 G for 3 minutes. A 10  $\mu$ L aliquot of the supernatant was  
595 assessed using the Megazyme Ethanol Assay Kit (Bray, Co. Wicklow, Ireland, Product code: K-  
596 ETOH). Absorbance measurements were taken using a Nanodrop ND-1000 (Nano-drop  
597 Technologies, Inc., Wilmington, DE). The A<sub>1</sub> measurement was taken after 5 minutes following  
598 the addition of the ALDH enzyme and the A<sub>2</sub> measurement 15 minutes following the addition of  
599 the ADH. ALDH absorbance was background subtracted from ADH absorbance to calculate  
600 NADH produced.

601

### 602 **Measuring alcohol dehydrogenase enzymatic activity**

603 The Alcohol Dehydrogenase activity assay kit from Sigma-Aldrich (product code:  
604 MAK053) was used. Twenty males per biological replicate were pretreated with 10% ethanol  
605 vapor for 30 minutes with a homemade vaporizer then immediately homogenized with a fitted  
606 plastic pestle in 200  $\mu$ L of ice cold ADH assay buffer, in a 1.5 mL microcentrifuge tube, until no  
607 particulates were visible. The homogenates were centrifuged at 10,000 G for 10 minutes. Ten  
608  $\mu$ L supernatant samples were assessed for ADH activity. Absorbance measurements were  
609 taken using a Tecan Safire 2 Plate Reader (Tecan Group Ltd., Männedorf, Zürich, Switzerland)  
610 and from these an NADH standard curve was generated. The initial absorbance measurement  
611 was taken two minutes following the addition of the enzyme mix (ADH assay buffer, developer,  
612 isopropanol substrate). The reaction was run at 27°C and absorbance measurements were  
613 recorded every minute for a total of 25 minutes. A  $\Delta$ Absorbance ( $\Delta A$ ) value was calculated for  
614 each sample by subtracting the initial absorbance from the final absorbance value. The  $\Delta A$  was  
615 used to calculate the ADH activity using the following equation:

$$616 \text{ ADH activity} = \frac{(\Delta A) \times (\text{sample dilution factor})}{(\text{Reaction time}) \times (\text{volume of reaction})}$$

617

### 618 **Statistical analysis**

619 All analyses were performed with GraphPad Prism 7 (GraphPad Software, Inc., La Jolla, CA).  
620 For comparisons with only two conditions, a Student's t test (or Mann-Whitney for non-normal  
621 distributed data) was performed. For experiments containing three or more conditions, an  
622 ANOVA analysis was used. Various posthoc analyses were performed depending on the type of  
623 comparison and sample distribution. For comparisons where experimental conditions were  
624 compared to only the control, a Dunnett's comparison was used. When all conditions were  
625 compared to each other and all samples had normal distributions, a Tukey's comparison was

626 used. When all conditions were compared to each other, and when at least one condition had a  
 627 non-normal distribution, a Sidak's comparison was used.

628 **Primers used in this study**

| Primer                       | Sequence                                                                                                                           | Purpose                          | Reference |
|------------------------------|------------------------------------------------------------------------------------------------------------------------------------|----------------------------------|-----------|
| Universal forward (8F)       | 5'-<br>AGAGTTTGATCMTGGCT<br>CAG-3'                                                                                                 | Testing microbes in fly cultures | [116]     |
| Universal reverse (1492R)    | 5'-<br>GGMTACCTTGTTACGAC<br>TT-3'                                                                                                  | Testing microbes in fly cultures | [117]     |
| <i>Acetobacter</i> forward   | 5'-<br>TAGTGGCGGACGGGTG<br>AGTA-3'                                                                                                 | Testing microbes in fly cultures | [118]     |
| <i>Acetobacter</i> reverse   | 5'-<br>AATCAAACGCAGGCTCC<br>TCC-3'                                                                                                 | Testing microbes in fly cultures |           |
| <i>Lactobacillus</i> forward | 5'-<br>AGGTAACGGCTCACCAT<br>GGC-3'                                                                                                 | Testing microbes in fly cultures |           |
| <i>Lactobacillus</i> reverse | 5'-<br>ATTCCCTACTGCTGCCT<br>CCC-3'                                                                                                 | Testing microbes in fly cultures |           |
| DNA Oligomer 1               | 5'-<br>ACCTACACGCTGCGCAA<br>CCGAGTCATGCCAATAT<br>AAGCAGATTAGCATTAC<br>TTTGAGCAACGTATCGG<br>CGATCAGTTCGCCAGCA<br>GTTGTAATGAGCCCC-3' | BARCODE assay                    | [63]      |
| DNA Oligomer 2               | 5'-<br>GGGCAGCAGGATAACT<br>CGAATGTCTTAGTGCTA<br>GAGGCTTGGGGCGTGT                                                                   | BARCODE assay                    |           |



|                                    |                                        |                                                                   |  |
|------------------------------------|----------------------------------------|-------------------------------------------------------------------|--|
|                                    |                                        | AAGTGTATCGAAGAAGT<br>TCGTGTAAACGCTTTG<br>GAATGACTGTAATGTAG-<br>3' |  |
| Forward qPCR<br>Primer 1           | 5'-<br>GCAACCGAGTCATGCCA<br>ATA-3'     | BARCODE alcohol<br>consumption qPCR                               |  |
| Reverse qPCR<br>Primer 1           | 5'-<br>TTACAACCTGCTGGCGAA<br>CTG-3'    | BARCODE alcohol<br>consumption qPCR                               |  |
| Forward qPCR<br>Primer 2           | 5'-<br>CAGCAGGATAACTCGAA<br>TGTCTTA-3' | BARCODE alcohol<br>consumption qPCR                               |  |
| Reverse qPCR<br>Primer 2           | 5'-<br>CAGTCATTCCAAAGCGT<br>TTAACA-3'  | BARCODE alcohol<br>consumption qPCR                               |  |
| <i>cyp1</i> Forward<br>qPCR primer | 5'-<br>ACCAACCACAACGGCAC<br>TG-3'      | BARCODE alcohol<br>consumption qPCR                               |  |
| <i>cyp1</i> Reverse<br>qPCR primer | 5'-<br>TGCTTCAGCTCGAAGTT<br>CTCATC-3'  | BARCODE alcohol<br>consumption qPCR                               |  |

629

## 630 **References**

- 631 [1] E. A. Eloe-Fadrosh and D. A. Rasko, "The human microbiome: from symbiosis to  
632 pathogenesis," *Annu Rev Med*, vol. 64, pp. 145–163, 2013.
- 633 [2] C. O. Elson, Y. Cong, V. J. McCracken, R. A. Dimmitt, R. G. Lorenz, and C. T. Weaver,  
634 "Experimental models of inflammatory bowel disease reveal innate, adaptive, and  
635 regulatory mechanisms of host dialogue with the microbiota," *Immunol Rev*, vol. 206, pp.  
636 260–276, 2005.
- 637 [3] W. J. Lee and P. T. Brey, "How microbiomes influence metazoan development: insights  
638 from history and *Drosophila* modeling of gut-microbe interactions," *Annu Rev Cell Dev*  
639 *Biol*, vol. 29, pp. 571–592, 2013.
- 640 [4] A. Gonzalez, J. Stombaugh, C. Lozupone, P. J. Turnbaugh, J. I. Gordon, and R. Knight,

- 641 “The mind-body-microbial continuum,” *Dialogues Clin Neurosci*, vol. 13, no. 1, pp. 55–62,  
642 2011.
- 643 [5] J. a. Foster and K. A. McVey Neufeld, “Gut-brain axis: How the microbiome influences  
644 anxiety and depression,” *Trends Neurosci.*, vol. 36, no. 5, pp. 305–312, 2013.
- 645 [6] F. Strati, D. Cavalieri, D. Albanese, C. De Felice, C. Donati, J. Hayek, O. Jousson, S.  
646 Leoncini, D. Renzi, A. Calabrò, and C. De Filippo, “New evidences on the altered gut  
647 microbiota in autism spectrum disorders,” *Microbiome*, vol. 5, no. 1, p. 24, 2017.
- 648 [7] N. A. Broderick and B. Lemaitre, “Gut-associated microbes of *Drosophila melanogaster* ©  
649 2012 Landes Bioscience . Do not distribute © 2012 Landes Bioscience . Do not  
650 distribute,” no. August, pp. 307–321, 2012.
- 651 [8] J. A. Chandler, J. Morgan Lang, S. Bhatnagar, J. A. Eisen, and A. Kopp, “Bacterial  
652 Communities of Diverse *Drosophila* Species: Ecological Context of a Host–Microbe  
653 Model System,” *PLoS Genet.*, vol. 7, no. 9, p. e1002272, 2011.
- 654 [9] F. Staubach, J. F. Baines, S. Künzel, E. M. Bik, and D. A. Petrov, “Host Species and  
655 Environmental Effects on Bacterial Communities Associated with *Drosophila* in the  
656 Laboratory and in the Natural Environment,” *PLoS One*, vol. 8, no. 8, 2013.
- 657 [10] C. Fischer, E. P. Trautman, J. M. Crawford, E. V Stabb, J. Handelsman, and N. A.  
658 Broderick, “Metabolite exchange between microbiome members produces compounds  
659 that influence *Drosophila* behavior,” *Elife*, vol. 6, pp. 1–25, 2017.
- 660 [11] G. Sharon, D. Segal, I. Zilber-Rosenberg, and E. Rosenberg, “Symbiotic bacteria are  
661 responsible for diet-induced mating preference in *Drosophila melanogaster*, providing  
662 support for the hologenome concept of evolution,” *Gut Microbes*, vol. 2, no. 3, pp. 190–  
663 192, 2011.
- 664 [12] A. Lize, R. McKay, and Z. Lewis, “Kin recognition in *Drosophila*: the importance of  
665 ecology and gut microbiota,” *ISME J*, vol. 8, no. 2, pp. 469–477, 2014.
- 666 [13] W. Liu, K. Zhang, Y. Li, W. Su, K. Hu, and S. Jin, “Enterococci Mediate the Oviposition  
667 Preference of *Drosophila melanogaster* through Sucrose Catabolism,” *Sci. Rep.*, vol. 7,  
668 no. 1, pp. 1–14, 2017.
- 669 [14] B. Obadia, E. S. Keebaugh, R. Yamada, W. B. Ludington, and W. W. Ja, “Diet influences  
670 host-microbiota associations in *Drosophila*,” *Proc. Natl. Acad. Sci. U. S. A.*, vol. 115, no.  
671 20, pp. E4547–E4548, May 2018.
- 672 [15] P. T. Leftwich, N. V. E. Clarke, M. I. Hutchings, and T. Chapman, “Reply to Obadia et al.:  
673 Effect of methyl paraben on host-microbiota interactions in *Drosophila melanogaster*,”  
674 *Proc. Natl. Acad. Sci. U. S. A.*, vol. 115, no. 20, pp. E4549–E4550, May 2018.

- 675 [16] A. C.-N. Wong, Q.-P. Wang, J. Morimoto, A. M. Senior, M. Lihoreau, G. G. Neely, S. J.  
676 Simpson, F. Ponton, J. K. Goodrich, J. I. Gordon, and et al., “Gut Microbiota Modifies  
677 Olfactory-Guided Microbial Preferences and Foraging Decisions in *Drosophila*,” *Curr.*  
678 *Biol.*, vol. 13, no. 0, pp. 163–167, 2017.
- 679 [17] J. P. Farine, W. Habbachi, J. Cortot, S. Roche, and J. F. Ferveur, “Maternally-transmitted  
680 microbiota affects odor emission and preference in *Drosophila* larva,” *Sci. Rep.*, vol. 7,  
681 no. 1, 2017.
- 682 [18] R. Leitão-Gonçalves, Z. Carvalho-Santos, A. P. Francisco, G. T. Fioreze, M. Anjos, C.  
683 Baltazar, A. P. Elias, P. M. Itskov, M. D. W. Piper, and C. Ribeiro, “Commensal bacteria  
684 and essential amino acids control food choice behavior and reproduction,” *PLOS Biol.*,  
685 vol. 15, no. 4, p. e2000862, 2017.
- 686 [19] S. C. Shin, S. H. Kim, H. You, B. Kim, A. C. Kim, K. A. Lee, J. H. Yoon, J. H. Ryu, and W.  
687 J. Lee, “*Drosophila* microbiome modulates host developmental and metabolic  
688 homeostasis via insulin signaling,” *Science (80-. )*, vol. 334, no. 6056, pp. 670–674,  
689 2011.
- 690 [20] G. Storelli, A. Defaye, B. Erkosar, P. Hols, and J. Royet, “*Lactobacillus plantarum*  
691 Promotes *Drosophila* Systemic Growth by Modulating Hormonal Signals through TOR-  
692 Dependent Nutrient Sensing,” *Cell Metab.*, vol. 14, pp. 403–414, 2011.
- 693 [21] A. Bonfini, X. Liu, and N. Buchon, “From pathogens to microbiota: How *Drosophila*  
694 intestinal stem cells react to gut microbes,” *Dev. Comp. Immunol.*, vol. 64, pp. 22–38,  
695 2016.
- 696 [22] E. Bier and A. Guichard, “Deconstructing host-pathogen interactions in *Drosophila*,” *Dis*  
697 *Model Mech*, vol. 5, no. 1, pp. 48–61, 2012.
- 698 [23] L. Anderson and J. Seilhamer, “A comparison of selected mRNA and protein abundances  
699 in human liver,” in *Electrophoresis*, 1997, vol. 18, no. 3–4, pp. 533–537.
- 700 [24] D. Greenbaum, C. Colangelo, K. Williams, and M. Gerstein, “Comparing protein  
701 abundance and mRNA expression levels on a genomic scale,” *Genome Biol.*, vol. 4, no.  
702 9, p. 117, 2003.
- 703 [25] T. Maier, M. Güell, and L. Serrano, “Correlation of mRNA and protein in complex  
704 biological samples,” *FEBS Letters*, vol. 583, no. 24. pp. 3966–3973, 2009.
- 705 [26] S. Munoz Descalzo, P. Rue, J. Garcia-Ojalvo, and A. Martinez Arias, “Correlations  
706 between the levels of Oct4 and Nanog as a signature for naive pluripotency in mouse  
707 embryonic stem cells,” *Stem Cells*, vol. 30, no. 12, pp. 2683–2691, 2012.
- 708 [27] S. P. Gygi, Y. Rochon, B. R. Franza, and R. Aebersold, “Correlation between Protein and

- 709 mRNA Abundance in Yeast Correlation between Protein and mRNA Abundance in  
710 Yeast,” *Mol. Cell. Biol.*, vol. 19, no. 3, pp. 1720–1730, 1999.
- 711 [28] F. Leulier, “Drosophila microbiota modulates host metabolic gene expression via IMD/NF-  
712  $\kappa$ B signaling,” *PLoS One*, vol. 9, no. 4, p. e94729, 2014.
- 713 [29] N. A. Broderick, N. Buchon, and B. Lemaitre, “Microbiota-Induced Changes in Drosophila  
714 melanogaster Host Gene Expression and Gut Morphology Microbiota-Induced Changes  
715 in Drosophila melanogaster Host Gene,” vol. 5, no. March 2016, pp. 1–13, 2014.
- 716 [30] C. Elya, V. Zhang, W. B. Ludington, and M. B. Eisen, “Stable host gene expression in the  
717 gut of adult Drosophila melanogaster with different bacterial mono-associations,” *PLoS  
718 One*, vol. 11, no. 11, 2016.
- 719 [31] B. Erkosar, G. Storelli, A. Defaye, and F. Leulier, “Host-Intestinal Microbiota Mutualism:  
720 ‘Learning on the Fly,’” *Cell Host Microbe*, vol. 13, no. 1, pp. 8–14, 2013.
- 721 [32] A. Bost, S. Franzenburg, K. L. Adair, V. G. Martinson, G. Loeb, and A. E. Douglas, “How  
722 gut transcriptional function of *Drosophila melanogaster* varies with the presence and  
723 composition of the gut microbiota,” *Mol. Ecol.*, vol. 27, no. 8, pp. 1848–1859, Apr. 2018.
- 724 [33] K. Petkau, M. Ferguson, S. Guntermann, and E. Foley, “Constitutive Immune Activity  
725 Promotes Tumorigenesis in Drosophila Intestinal Progenitor Cells,” *Cell Rep.*, vol. 20, no.  
726 8, pp. 1784–1793, 2017.
- 727 [34] A. J. Dobson, J. M. Chaston, and A. E. Douglas, “The Drosophila transcriptional network  
728 is structured by microbiota,” *BMC Genomics*, pp. 1–9, 2016.
- 729 [35] M. A. Blundon, D. R. Schlesinger, A. Parthasarathy, S. L. Smith, H. M. Kolev, D. A.  
730 Vinson, E. Kunttas-Tatli, B. M. McCartney, and J. S. Minden, “Proteomic analysis reveals  
731 APC-dependent post translational modifications and identifies a novel regulator of  $\beta$ -  
732 catenin,” *Development*, p. dev.130567, 2016.
- 733 [36] L. Gong, M. Puri, M. Unlü, M. Young, K. Robertson, S. Viswanathan, A. Krishnaswamy,  
734 S. R. Dowd, and J. S. Minden, “Drosophila ventral furrow morphogenesis: a proteomic  
735 analysis.” *Development*, vol. 131, no. 3, pp. 643–56, 2004.
- 736 [37] M. D. Filiou, Y. Zhang, L. Teplytska, S. Reckow, P. Gormanns, G. MacCarrone, E. Frank,  
737 M. S. Kessler, B. Hamsch, M. Nussbaumer, M. Bunck, T. Ludwig, A. Yassouridis, F.  
738 Holsboer, R. Landgraf, and C. W. Turck, “Proteomics and metabolomics analysis of a trait  
739 anxiety mouse model reveals divergent mitochondrial pathways,” *Biol. Psychiatry*, vol. 70,  
740 no. 11, pp. 1074–1082, 2011.
- 741 [38] K. C., T. M., and J. U., “Effects of oxidative stress on behavior, physiology, and the redox  
742 thiol proteome of *Caenorhabditis elegans*,” *Antioxidants Redox Signal.*, vol. 14, no. 6, pp.

- 743 1023–1037, 2011.
- 744 [39] E. Bertin and S. Arnouts, “SExtractor: Software for source extraction,” *Astron. Astrophys. Suppl. Ser.*, vol. 117, no. 2, pp. 393–404, 1996.
- 745
- 746 [40] N. a. N. Broderick, N. Buchon, and B. Lemaitre, “Microbiota-Induced Changes in
- 747 *Drosophila melanogaster* Host Gene Expression and Gut Morphology,” *MBio*, vol. 5, no.
- 748 3, pp. 1–13, 2014.
- 749 [41] A. Bost, V. G. Martinson, S. Franzenburg, K. L. Adair, A. Albasi, M. T. Wells, and A. E.
- 750 Douglas, “Functional variation in the gut microbiome of wild *Drosophila* populations,” *Mol.*
- 751 *Ecol.*, vol. 27, no. 13, pp. 2834–2845, Jul. 2018.
- 752 [42] V. N., F. J., and S.-C. M.C., “Developmental profile and tissue distribution of *Drosophila*
- 753 alcohol dehydrogenase: An immunochemical analysis with monoclonal antibodies,” *J.*
- 754 *Histochem. Cytochem.*, vol. 40, no. 1, pp. 39–49, 1992.
- 755 [43] A. R. Rodan and A. Rothenfluh, “The Genetics of Behavioral Alcohol Responses in
- 756 *Drosophila*,” *Int. Rev. Neurobiol.*, vol. 91, no. C, pp. 25–51, 2010.
- 757 [44] H. J. Edenberg, “The genetics of alcohol metabolism: role of alcohol dehydrogenase and
- 758 aldehyde dehydrogenase variants.,” *Alcohol Res. Health*, vol. 30, no. 1, pp. 5–13, 2007.
- 759 [45] F. W. Wolf, A. R. Rodan, L. T.-Y. Tsai, and U. Heberlein, “High-resolution analysis of
- 760 ethanol-induced locomotor stimulation in *Drosophila*,” *J. Neurosci.*, vol. 22, no. 24, pp.
- 761 11035–11044, 2002.
- 762 [46] F. W. Wolf and U. Heberlein, “Invertebrate models of drug abuse.,” *J. Neurobiol.*, vol. 54,
- 763 no. 1, pp. 161–178, 2003.
- 764 [47] A. V Devineni and U. Heberlein, “The evolution of *Drosophila melanogaster* as a model
- 765 for alcohol research.,” *Annu. Rev. Neurosci.*, vol. 36, pp. 121–38, 2013.
- 766 [48] N. Cadieu, J. C. Cadieu, L. El Ghadraoui, A. Grimal, and Y. Lambœuf, “Conditioning to
- 767 ethanol in the fruit fly - A study using an inhibitor of ADH,” *J. Insect Physiol.*, vol. 45, no.
- 768 6, pp. 579–586, 1999.
- 769 [49] M. A. Schuckit, “A clinical model of genetic influences in alcohol dependence,” *J Stud*
- 770 *Alcohol*, vol. 55, no. 1, pp. 5–17, 1994.
- 771 [50] A. Park, A. Ghezzi, T. P. Wijesekera, and N. S. Atkinson, “Genetics and genomics of
- 772 alcohol responses in *Drosophila*,” *Neuropharmacology*, vol. 122, pp. 22–35, 2017.
- 773 [51] J. M. Chaston, A. J. Dobson, P. D. Newell, and A. E. Douglas, “Host genetic control of the
- 774 microbiota mediates the *Drosophila* nutritional phenotype,” *Appl. Environ. Microbiol.*, vol.
- 775 82, no. 2, pp. 671–679, 2016.
- 776 [52] A. C. Ericsson, J. W. Davis, W. Spollen, N. Bivens, S. Givan, C. E. Hagan, M. McIntosh,

- 777 and C. L. Franklin, "Effects of vendor and genetic background on the composition of the  
778 fecal microbiota of inbred mice," *PLoS One*, vol. 10, no. 2, 2015.
- 779 [53] A. M. Early, N. Shanmugarajah, N. Buchon, and A. G. Clark, "Drosophila Genotype  
780 Influences Commensal Bacterial Levels," *PLoS One*, vol. 12, no. 1, p. e0170332, 2017.
- 781 [54] C. Singh and U. Heberlein, "Genetic Control of Acute Ethanol-Induced Behaviors in  
782 Drosophila," *Alcohol. Clin. Exp. Res.*, vol. 24, no. 8, pp. 1127–1136, 2000.
- 783 [55] H. Scholz, J. Ramond, C. M. Singh, and U. Heberlein, "Functional Ethanol Tolerance in  
784 Drosophila," *Neuron*, vol. 28, no. 1, pp. 261–271, 2000.
- 785 [56] K. R. Kaun, A. V. Devineni, and U. Heberlein, "Drosophila melanogaster as a model to  
786 study drug addiction," *Hum. Genet.*, vol. 131, no. 6, pp. 959–975, 2012.
- 787 [57] T. Maples and A. Rothenfluh, "A simple way to measure ethanol sensitivity in flies.," *J.*  
788 *Vis. Exp.*, no. 48, pp. 48–50, 2011.
- 789 [58] M. A. Schuckit, "Low level of response to alcohol as a predictor of future alcoholism," *Am.*  
790 *J. Psychiatry*, vol. 151, no. 2, pp. 184–189, Feb. 1994.
- 791 [59] W. W. Ja, G. B. Carvalho, E. M. Mak, N. N. de la Rosa, A. Y. Fang, J. C. Liong, T.  
792 Brummel, and S. Benzer, "Prandiology of Drosophila and the CAFE assay," *Proc Natl*  
793 *Acad Sci U S A*, vol. 104, no. 20, pp. 8253–8256, 2007.
- 794 [60] A. V. Devineni and U. Heberlein, "Preferential Ethanol Consumption in Drosophila Models  
795 Features of Addiction," *Curr. Biol.*, vol. 19, no. 24, pp. 2126–2132, 2009.
- 796 [61] R. L. Peru, S. A. Ojelade, P. S. Penninti, R. J. Dove, M. J. Nye, S. F. Acevedo, A. Lopez,  
797 A. R. Rodan, and A. Rothenfluh, "Long-lasting, experience-dependent alcohol preference  
798 in Drosophila," *Addict. Biol.*, vol. 19, no. 3, pp. 392–401, 2014.
- 799 [62] J. B. Pohl, B. A. Baldwin, B. L. Dinh, P. Rahman, D. Smerek, F. J. Prado, N. Sherazee,  
800 and N. S. Atkinson, "Ethanol Preference in Drosophila melanogaster is Driven by Its  
801 Caloric Value," *Alcohol. Clin. Exp. Res.*, vol. 36, no. 11, pp. 1903–1912, 2012.
- 802 [63] A. Park, T. Tran, and N. S. Atkinson, "Monitoring food preference in *Drosophila* by  
803 oligonucleotide tagging," *PNAS*, vol 115, no. 36, pp. 9020-9025, 2018.
- 804 [64] E. Org, M. Mehrabian, B. W. Parks, P. Shipkova, X. Liu, T. A. Drake, and A. J. Lulis,  
805 "Sex differences and hormonal effects on gut microbiota composition in mice," *Gut*  
806 *Microbes*, vol. 7, no. 4, pp. 313–322, 2016.
- 807 [65] C. Haro, O. A. Rangel-zú, J. F. Alcalá-díaz, F. Gómez-Delgado, P. Pérez-Martínez, J.  
808 Delgado-Lista, G. M. Quintana-Navarro, B. B. Landa, J. A. Navas-Cortes, M. Tena-  
809 Sempere, J. C. Clemente, J. Lopez-Miranda, F. Perez-Jimenez, and A. Camargo,  
810 "Intestinal Microbiota Is Influenced by Gender and Body Mass Index," *PLoS One*, no.

- 811 May, pp. 1–16, 2016.
- 812 [66] G. Han, H. J. Lee, S. E. Jeong, C. O. Jeon, and S. Hyun, “Comparative Analysis of  
813 *Drosophila melanogaster* Gut Microbiota with Respect to Host Strain, Sex, and Age,”  
814 *Microb. Ecol.*, 2017.
- 815 [67] L. Yurkovetskiy, M. Burrows, A. A. Khan, L. Graham, P. Volchkov, L. Becker, D.  
816 Antonopoulos, Y. Umesaki, and A. V. Chervonsky, “Gender bias in autoimmunity is  
817 influenced by microbiota,” *Immunity*, vol. 39, no. 2, pp. 400–412, 2013.
- 818 [68] G. Xie, X. Wang, A. Zhao, J. Yan, W. Chen, R. Jiang, J. Ji, F. Huang, Y. Zhang, S. Lei, K.  
819 Ge, X. Zheng, C. Rajani, R. A. Alegado, J. Liu, P. Liu, J. Nicholson, and W. Jia, “Sex-  
820 dependent effects on gut microbiota regulate hepatic carcinogenic outcomes,” *Sci. Rep.*,  
821 vol. 7, no. December 2016, p. 45232, 2017.
- 822 [69] F. Fransen, A. A. van Beek, T. Borghuis, B. Meijer, F. Hugenholtz, C. van der Gaast-de  
823 Jongh, H. F. Savelkoul, M. I. de Jonge, M. M. Faas, M. V. Boekschoten, H. Smidt, S. El  
824 Aidy, and P. de Vos, “The Impact of Gut Microbiota on Gender-Specific Differences in  
825 Immunity,” *Front. Immunol.*, vol. 8, no. June, p. 754, 2017.
- 826 [70] B. E. Combe, A. Defaye, N. Bozonnet, D. Puthier, J. Royet, and F. Leulier, “*Drosophila*  
827 microbiota modulates host metabolic gene expression via IMD/NF- $\kappa$ B signaling,” *PLoS*  
828 *One*, vol. 9, no. 4, 2014.
- 829 [71] L. G. Lange III, J. F. Riordan, B. L. Vallee, and C. I. Branden, “The role of arginyl  
830 residues in directing carboxymethylation of horse liver alcohol dehydrogenase,”  
831 *Biochemistry*, vol. 14, no. 15, pp. 3497–3502, 1975.
- 832 [72] H. Jörnvall, L. G. Lange, J. F. Riordan, and B. L. Vallee, “Identification of a reactive  
833 arginyl residue in horse liver alcohol dehydrogenase,” *Biochem. Biophys. Res. Commun.*,  
834 vol. 77, no. 1, pp. 73–78, 1977.
- 835 [73] H. Jörnvall, T. Fairwell, P. Kratofil, and C. Wills, “Differences in alpha-amino acetylation of  
836 isozymes of yeast alcohol dehydrogenase,” *FEBS Lett.*, vol. 111, no. 1, pp. 214–8, Feb.  
837 1980.
- 838 [74] H. Ursprung, W. H. Sofer, and N. Burroughs, “Ontogeny and tissue distribution of alcohol  
839 dehydrogenase in *Drosophila melanogaster*,” *Wilhelm Roux. Arch. Entwickl. Mech. Org.*,  
840 vol. 164, no. 3, pp. 201–208, 1970.
- 841 [75] B. Ugur, K. Chen, and H. J. Bellen, “*Drosophila* tools and assays for the study of human  
842 diseases,” *Dis. Model. Mech.*, vol. 9, no. 3, pp. 235–244, 2016.
- 843 [76] I. A. Droujinine and N. Perrimon, “Interorgan communication pathways in physiology:  
844 focus on *Drosophila*,” *Annu. Rev. Genet.*, vol. 50, pp. 539–570, 2016.

- 845 [77] Y. Zhang and Y. Xi, "Fat Body Development and its Function in Energy Storage and  
846 Nutrient Sensing in *Drosophila melanogaster*," *Tissue Sci. Eng.*, vol. 6, no. 1, pp. 1–8,  
847 2014.
- 848 [78] Q. Liu and L. H. Jin, "Organ-to-Organ Communication: A *Drosophila* Gastrointestinal  
849 Tract Perspective," *Front. Cell Dev. Biol.*, vol. 5, no. April, p. 29, 2017.
- 850 [79] G. Roman, K. Endo, L. Zong, and R. L. Davis, "P[Switch], a system for spatial and  
851 temporal control of gene expression in *Drosophila melanogaster*," *Proc. Natl. Acad. Sci.*  
852 *U. S. A.*, vol. 98, no. 22, pp. 12602–7, Oct. 2001.
- 853 [80] N. Banerjee, "Neurotransmitters in alcoholism: A review of neurobiological and genetic  
854 studies," *Indian J. Hum. Genet.*, vol. 20, no. 1, pp. 20–31, Jan. 2014.
- 855 [81] A. Belmer, O. L. Patkar, K. M. Pitman, and S. E. Bartlett, "Serotonergic Neuroplasticity in  
856 Alcohol Addiction," *Brain Plast.*, vol. 1, no. 2, pp. 177–206, Jun. 2016.
- 857 [82] C. . Faingold, P. N'Gouemo, and A. Riaz, "Ethanol and neurotransmitter interactions—  
858 from molecular to integrative effects," *Prog. Neurobiol.*, vol. 55, no. 5, pp. 509–535, Aug.  
859 1998.
- 860 [83] H. Trantham-Davidson and L. J. Chandler, "Alcohol-induced alterations in dopamine  
861 modulation of prefrontal activity," *Alcohol*, vol. 49, no. 8, pp. 773–779, Dec. 2015.
- 862 [84] N. Lotfullina and R. Khazipov, "Ethanol and the Developing Brain: Inhibition of Neuronal  
863 Activity and Neuroapoptosis," *Neurosci.*, vol. 24, no. 2, pp. 130–141, Apr. 2018.
- 864 [85] M. Sozio and D. W. Crabb, "Alcohol and lipid metabolism," *Am. J. Physiol. Endocrinol.*  
865 *Metab.*, vol. 295, no. 1, pp. E10–6, Jul. 2008.
- 866 [86] E. Baraona and C. S. Lieber, "Effects of ethanol on lipid metabolism," *J. Lipid Res.*, vol.  
867 20, no. 3, pp. 289–315, Mar. 1979.
- 868 [87] D. W. Crabb and S. Liangpunsakul, "Alcohol and lipid metabolism," *J. Gastroenterol.*  
869 *Hepatol.*, vol. 21, no. s3, pp. S56–S60, Oct. 2006.
- 870 [88] V. Tremaroli and F. Bäckhed, "Functional interactions between the gut microbiota and  
871 host metabolism," *Nature*, vol. 489, no. 7415, pp. 242–249, 2012.
- 872 [89] D. F. Macfabe MD, "Short-chain fatty acid fermentation products of the gut microbiome:  
873 implications in autism spectrum disorders," *Microb. Ecol. Health Dis.*, vol. 23, pp. 1–24,  
874 2012.
- 875 [90] D. F. MacFabe, "Enteric short-chain fatty acids: microbial messengers of metabolism,  
876 mitochondria, and mind: implications in autism spectrum disorders," *Microb. Ecol. Health*  
877 *Dis.*, vol. 26, p. 28177, 2015.
- 878 [91] C. Meyer, E. Kowarz, J. Hofmann, A. Renneville, J. Zuna, J. Trka, R. Ben Abdelali, E.



- 879 Macintyre, E. De Braekeleer, M. De Braekeleer, E. Delabesse, M. P. de Oliveira, H.  
880 Cave, E. Clappier, J. J. van Dongen, B. V Balgobind, M. M. van den Heuvel-Eibrink, H. B.  
881 Beverloo, R. Panzer-Grumayer, A. Teigler-Schlegel, J. Harbott, E. Kjeldsen, S.  
882 Schnittger, U. Koehl, B. Gruhn, O. Heidenreich, L. C. Chan, S. F. Yip, M. Krzywinski, C.  
883 Eckert, A. Moricke, M. Schrappe, C. N. Alonso, B. W. Schafer, J. Krauter, D. A. Lee, U.  
884 Zur Stadt, G. Te Kronnie, R. Sutton, S. Izraeli, L. Trakhtenbrot, L. Lo Nigro, G. Tsaur, L.  
885 Fechina, T. Szczepanski, S. Strehl, D. Ilencikova, M. Molquentin, T. Burmeister, T.  
886 Dingermann, T. Klingebiel, and R. Marschalek, “New insights to the MLL recombinome of  
887 acute leukemias,” *Leukemia*, vol. 23, no. 8, pp. 1490–1499, 2009.
- 888 [92] I. Sekirov, S. L. Russell, L. C. M. Antunes, and B. B. Finlay, “Gut Microbiota in Health and  
889 Disease,” *Physiol. Rev.*, vol. 90, no. 3, pp. 859–904, Jul. 2010.
- 890 [93] M. W. Bourassa, I. Alim, S. J. Bultman, and R. R. Ratan, “Butyrate, neuroepigenetics and  
891 the gut microbiome: Can a high fiber diet improve brain health?,” *Neuroscience Letters*,  
892 vol. 625, pp. 56–63, 2016.
- 893 [94] J. R. Marchesi, D. H. Adams, F. Fava, G. D. a Hermes, G. M. Hirschfield, G. Hold, M. N.  
894 Quraishi, J. Kinross, H. Smidt, K. M. Tuohy, L. V Thomas, E. G. Zoetendal, and A. Hart,  
895 “The gut microbiota and host health: a new clinical frontier,” *Gut*, pp. 1–10, 2015.
- 896 [95] P. D. Newell and A. E. Douglas, “Interspecies Interactions Determine the Impact of the  
897 Gut Microbiota on Nutrient Allocation in *Drosophila melanogaster*,” *Appl. Environ.*  
898 *Microbiol.*, vol. 80, no. 2, pp. 788–796, 2014.
- 899 [96] A. C. Wong, A. J. Dobson, and A. E. Douglas, “Gut microbiota dictates the metabolic  
900 response of *Drosophila* to diet,” *J Exp Biol*, vol. 217, no. Pt 11, pp. 1894–1901, 2014.
- 901 [97] M. Chakir, O. Peridy, P. Capy, E. Pla, and J. R. David, “Adaptation to alcoholic  
902 fermentation in *Drosophila*: a parallel selection imposed by environmental ethanol and  
903 acetic acid.,” *Proc. Natl. Acad. Sci. U. S. A.*, vol. 90, no. 8, pp. 3621–3625, 1993.
- 904 [98] B. W. Geer, M. L. Langevin, and S. W. McKechnie, “Dietary ethanol and lipid synthesis in  
905 *Drosophila melanogaster*,” *Biochem. Genet.*, vol. 23, no. 7–8, pp. 607–622, 1985.
- 906 [99] S. C. Shin, S.-H. Kim, H. You, B. Kim, A. C. Kim, K.-A. Lee, J.-H. Yoon, J.-H. Ryu, and  
907 W.-J. Lee, “*Drosophila* microbiome modulates host developmental and metabolic  
908 homeostasis via insulin signaling.,” *Science*, vol. 334, no. 6056, pp. 670–4, 2011.
- 909 [100] G. Kim, J. H. Huang, J. G. McMullen, P. D. Newell, and A. E. Douglas, “Physiological  
910 responses of insects to microbial fermentation products: insights from the interactions  
911 between *Drosophila* and acetic acid,” *J. Insect Physiol.*, 2017.
- 912 [101] A. J. Dobson, J. M. Chaston, P. D. Newell, L. Donahue, S. L. Hermann, D. R. Sannino, S.

- 913 Westmiller, A. C. Wong, A. G. Clark, B. P. Lazzaro, and A. E. Douglas, “Host genetic  
914 determinants of microbiota-dependent nutrition revealed by genome-wide analysis of  
915 *Drosophila melanogaster*,” *Nat Commun*, vol. 6, p. 6312, 2015.
- 916 [102] M. a Schuckit, T. L. Smith, and J. Kalmijn, “The search for genes contributing to the low  
917 level of response to alcohol: patterns of findings across studies.,” *Alcohol. Clin. Exp.*  
918 *Res.*, vol. 28, no. 10, pp. 1449–1458, 2004.
- 919 [103] A. C. Heath, P. A. F. Madden, K. K. Bucholz, S. H. Dinwiddie, W. S. Slutske, L. J. Bierut,  
920 J. W. Rohrbaugh, D. J. Statham, M. P. Dunne, J. B. Whitfield, and N. G. Mar Tin,  
921 “Genetic differences in alcohol sensitivity and the inheritance of alcoholism risk,” *Psychol.*  
922 *Med.*, vol. 29, pp. 1069–1081, 1999.
- 923 [104] M. C. C. Canesso, N. L. Lacerda, C. M. Ferreira, J. L. Gonçalves, D. Almeida, C. Gamba,  
924 G. Cassali, S. H. Pedroso, C. Moreira, F. S. Martins, J. R. Nicoli, M. M. Teixeira, A. L. B.  
925 Godard, and A. T. Vieira, “Comparing the effects of acute alcohol consumption in germ-  
926 free and conventional mice: the role of the gut microbiota,” *BMC Microbiol.*, vol. 14, no. 1,  
927 p. 240, 2014.
- 928 [105] E. a Mutlu, P. M. Gillevet, H. Rangwala, M. Sikaroodi, A. Naqvi, P. a Engen, M. Kwasny,  
929 C. K. Lau, and A. Keshavarzian, “Colonic microbiome is altered in alcoholism.,” *Am. J.*  
930 *Physiol. Gastrointest. Liver Physiol.*, vol. 302, no. 9, pp. G966-78, 2012.
- 931 [106] J. Gorky and J. Schwaber, “The role of the gut – brain axis in alcohol use disorders,”  
932 *Prog. Neuropsychopharmacol. Biol. Psychiatry*, vol. 65, pp. 234–241, 2016.
- 933 [107] S. Leclercq, S. Matamoros, P. D. Cani, A. M. Neyrinck, F. Jamar, P. Starkel, K. Windey,  
934 V. Tremaroli, F. Backhed, K. Verbeke, P. de Timary, and N. M. Delzenne, “Intestinal  
935 permeability, gut-bacterial dysbiosis, and behavioral markers of alcohol-dependence  
936 severity,” *Proc Natl Acad Sci U S A*, vol. 111, no. 42, pp. E4485-93, 2014.
- 937 [108] M. L. Koyle, M. Veloz, A. M. Judd, A. C.-N. Wong, P. D. Newell, A. E. Douglas, and J. M.  
938 Chaston, “Rearing the Fruit Fly *Drosophila melanogaster* Under Axenic and Gnotobiotic  
939 Conditions,” *J. Vis. Exp.*, no. 113, pp. 1–8, 2016.
- 940 [109] A. Tech, B. Med, D. Sabat, E. M. Johnson, A. Abhinay, R. Jayabalan, and M. Mishra, “A  
941 protocol to generate germ free *Drosophila* for microbial interaction studies,” *Adv. Tech.*  
942 *Biol. Med.*, vol. S1, pp. 1–6, 2015.
- 943 [110] M. Unlu, M. E. Morgan, and J. S. Minden, “Difference gel electrophoresis: a single gel  
944 method for detecting changes in protein extracts,” *Electrophoresis*, vol. 18, no. 11, pp.  
945 2071–2077, 1997.
- 946 [111] P. T. Van, V. Ganesan, V. Bass, A. Parthasarathy, D. Schlesinger, and J. S. Minden, “In-

- 947 gel equilibration for improved protein retention in 2DE-based proteomic workflows,”  
948 *Electrophoresis*, vol. 35, no. 20, pp. 3012–3017, 2014.
- 949 [112] P. T. Van, V. Bass, D. Shiwarski, F. Lanni, and J. Minden, “High dynamic range proteome  
950 imaging with the structured illumination gel imager,” *Electrophoresis*, vol. 35, no. 18, pp.  
951 2642–2655, 2014.
- 952 [113] M. A. Blundon, D. R. Schlesinger, A. Parthasarathy, S. L. Smith, H. M. Kolev, D. A.  
953 Vinson, E. Kunttas-Tatli, B. M. McCartney, and J. S. Minden, “Proteomic analysis reveals  
954 APC-dependent post translational modifications and identifies a novel regulator of  $\beta$ -  
955 catenin,” *Development*, p. dev.130567, 2016.
- 956 [114] F. Ponton, M. P. Chapuis, M. Pernice, G. A. Sword, and S. J. Simpson, “Evaluation of  
957 potential reference genes for reverse transcription-qPCR studies of physiological  
958 responses in *Drosophila melanogaster*,” *J. Insect Physiol.*, vol. 57, no. 6, pp. 840–850,  
959 2011.
- 960 [115] M. W. Pfaffl, “A new mathematical model for relative quantification in real-time RT-PCR.,”  
961 *Nucleic Acids Res.*, vol. 29, no. 9, p. e45, 2001.
- 962 [116] U. Edwards, T. Rogall, H. Blöcker, M. Emde, and E. C. Böttger, “Isolation and direct  
963 complete nucleotide determination of entire genes. Characterization of a gene coding for  
964 16S ribosomal RNA,” *Nucleic Acids Res.*, vol. 17, no. 19, pp. 7843–7853, 1989.
- 965 [117] P. a Eden, T. M. Schmidt, R. P. Blakemore, and N. R. Pace, “Phylogenetic analysis of  
966 *Aquaspirillum magnetotacticum* using polymerase chain reaction-amplified 16S rRNA-  
967 specific DNA.,” *Int. J. Syst. Bacteriol.*, vol. 41, no. 2, pp. 324–325, 1991.
- 968 [118] M. Elgart, S. Stern, O. Salton, Y. Gnainsky, Y. Heifetz, and Y. Soen, “Impact of gut  
969 microbiots on the fly’s germ line.,” *Nat. Commun.*, 2016.
- 970
